# Supplementary material for: A Diels–Alder approach to the enantioselective construction of fluoromethylated stereogenic carbon centers
Source: Royal Society of Chemistry journal article supplement (doi:10.1039/c1cc15889a), 2011-11-11

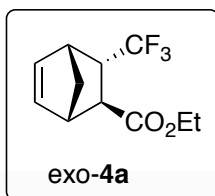

<sup>1</sup>H NMR

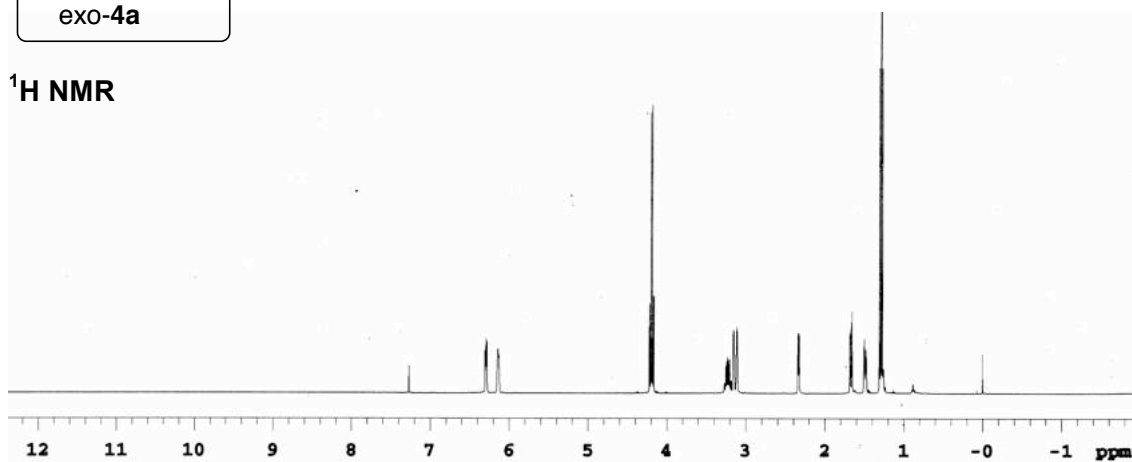

<sup>13</sup>C NMR

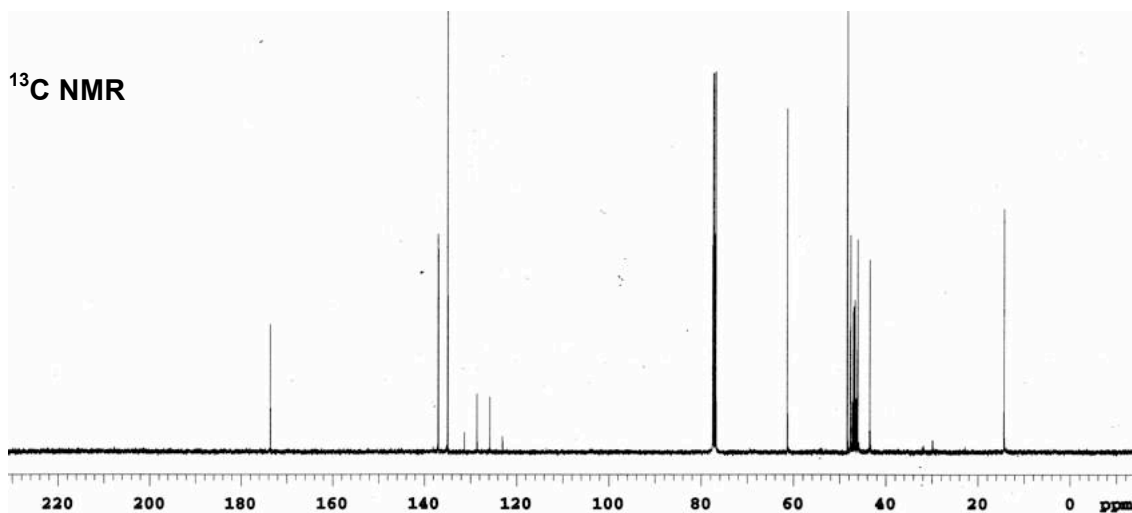

GC *racemic*

(exo/endo = 24/76)

GC *optically active*

(exo/endo = 22/78)

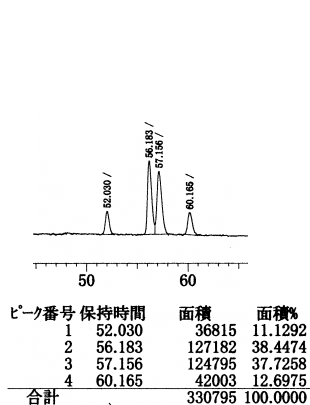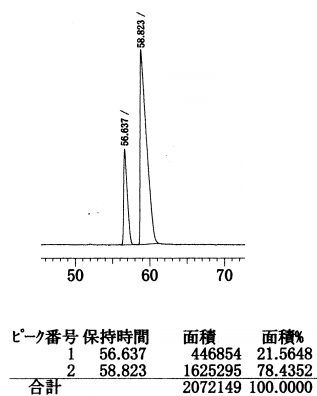

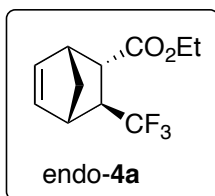

**$^1\text{H}$  NMR**

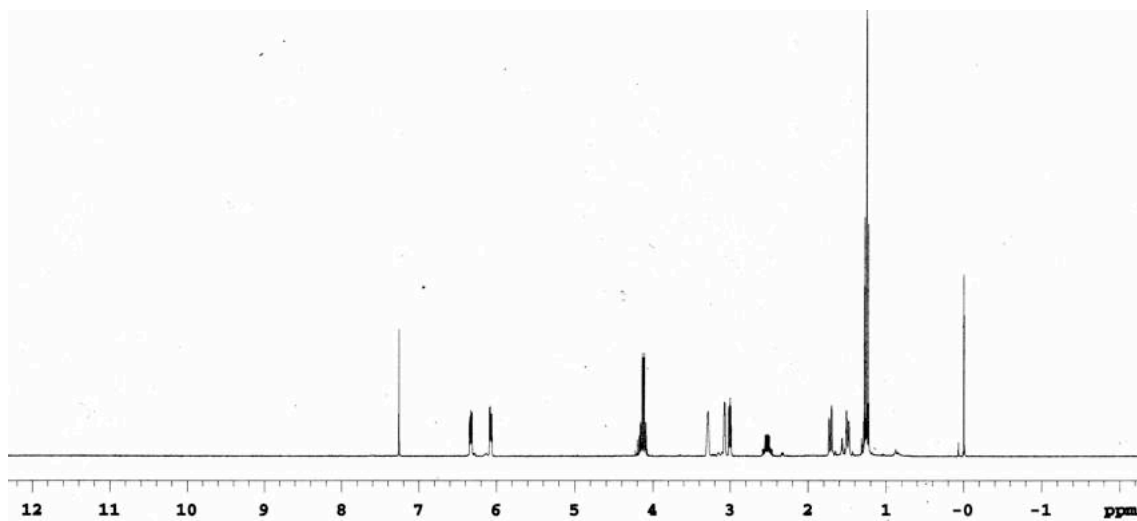

**$^{13}\text{C}$  NMR**

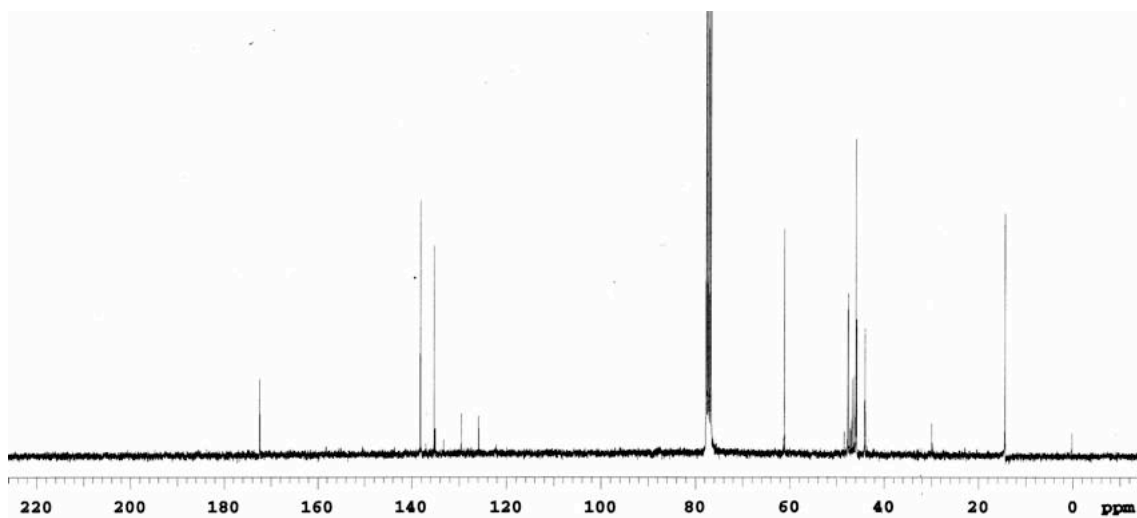

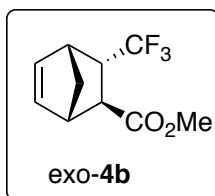

**<sup>1</sup>H NMR**

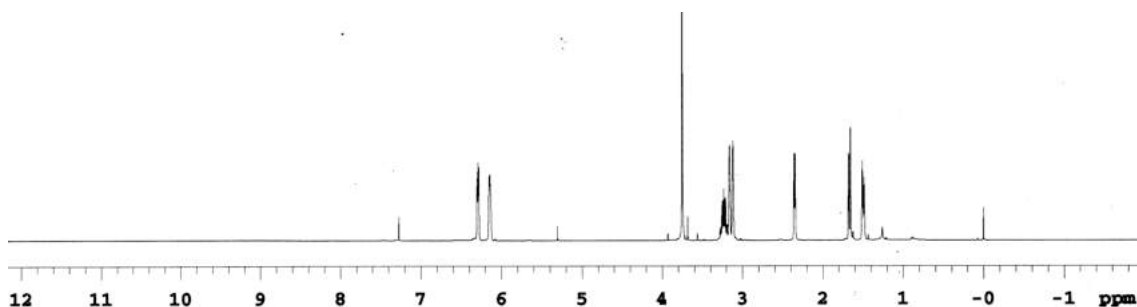

**<sup>13</sup>C NMR**

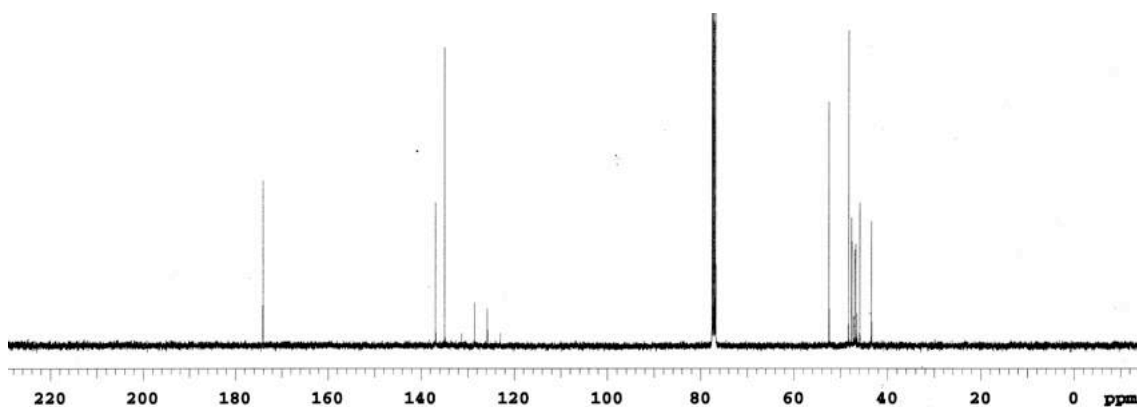

**GC racemic**

(exo/endo = 80/20)

**GC optically active**

(exo/endo = 88/12)

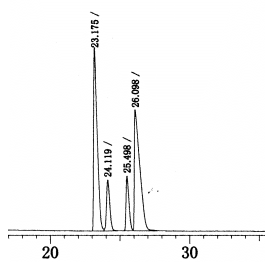

| ピーク番号 | 保持時間   | 面積      | 面積%      |
|-------|--------|---------|----------|
| 1     | 23.175 | 1608071 | 40.0084  |
| 2     | 24.119 | 410494  | 10.2130  |
| 3     | 25.498 | 393917  | 9.8005   |
| 4     | 26.098 | 1606855 | 39.9781  |
| 合計    |        | 4019337 | 100.0000 |

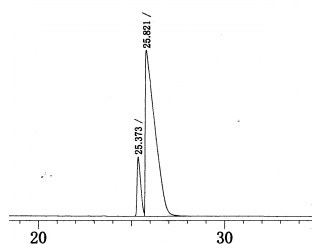

| ピーク番号 | 保持時間   | 面積      | 面積%      |
|-------|--------|---------|----------|
| 1     | 25.373 | 438044  | 11.8053  |
| 2     | 25.821 | 3272522 | 88.1947  |
| 合計    |        | 3710566 | 100.0000 |

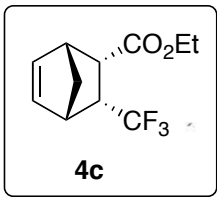

<sup>1</sup>H NMR

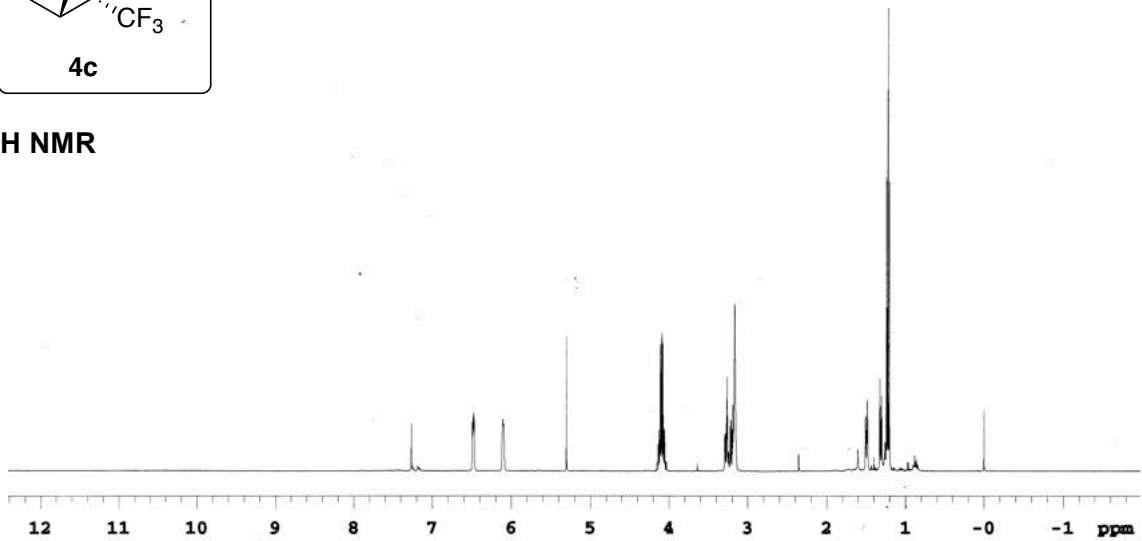

<sup>13</sup>C NMR

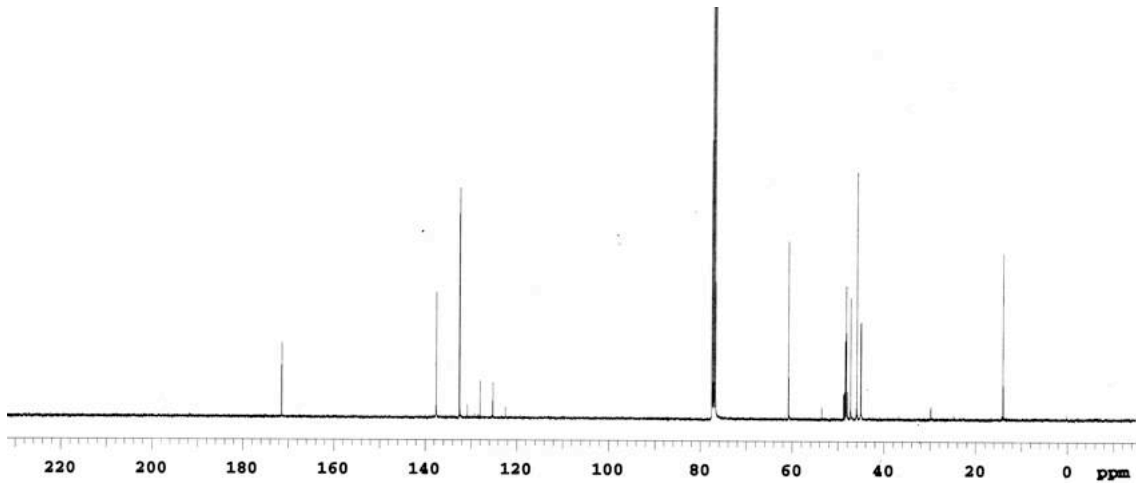

GC *racemic*

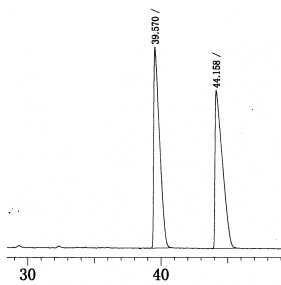

| ピーク番号 | 保持時間   | 面積      | 面積%      |
|-------|--------|---------|----------|
| 1     | 39.570 | 865302  | 50.0083  |
| 2     | 44.158 | 865015  | 49.9917  |
| 合計    |        | 1730317 | 100.0000 |

GC *optically active*

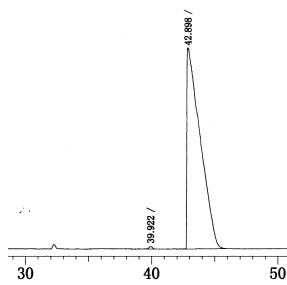

| ピーク番号 | 保持時間   | 面積      | 面積%      |
|-------|--------|---------|----------|
| 1     | 39.922 | 13511   | 0.3287   |
| 2     | 42.898 | 4096674 | 99.6713  |
| 合計    |        | 4110185 | 100.0000 |



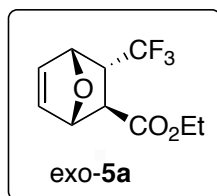

<sup>1</sup>H NMR

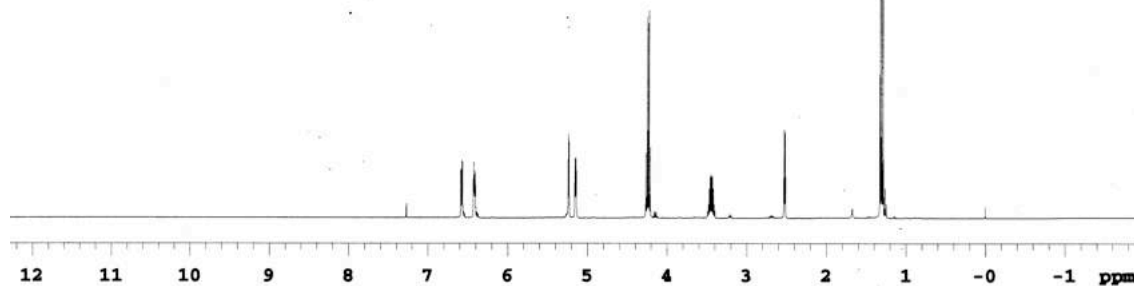

<sup>13</sup>C NMR

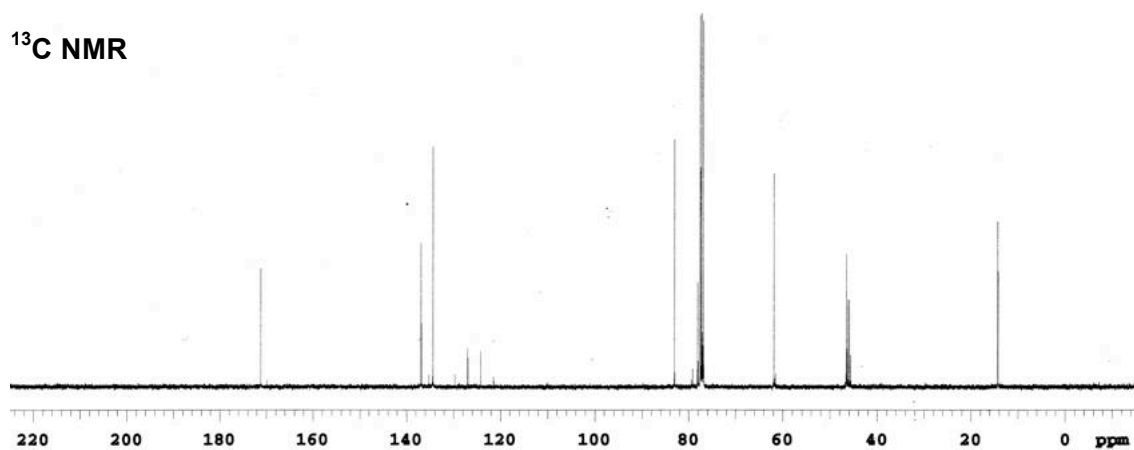

GC racemic

(exo/endo = 20/80)

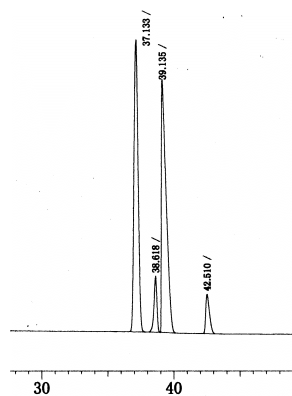

| ピーク番号 | 保持時間   | 面積      | 面積%      |
|-------|--------|---------|----------|
| 1     | 37.133 | 1425938 | 44.4291  |
| 2     | 38.618 | 191750  | 5.9745   |
| 3     | 39.135 | 1418732 | 44.2046  |
| 4     | 42.510 | 173047  | 5.3918   |
| 合計    |        | 3209467 | 100.0000 |

GC optically active (exo/endo = 76/24)

t = 37.1 (endo), t = 42.5 (exo)

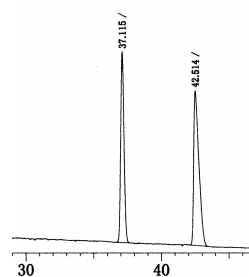

| ピーク番号 | 保持時間   | 面積     | 面積%      |
|-------|--------|--------|----------|
| 1     | 37.115 | 239232 | 44.1395  |
| 2     | 42.514 | 302759 | 55.8605  |
| 合計    |        | 541991 | 100.0000 |

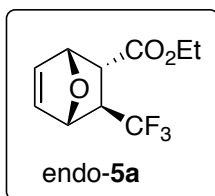

**$^1\text{H}$  NMR**

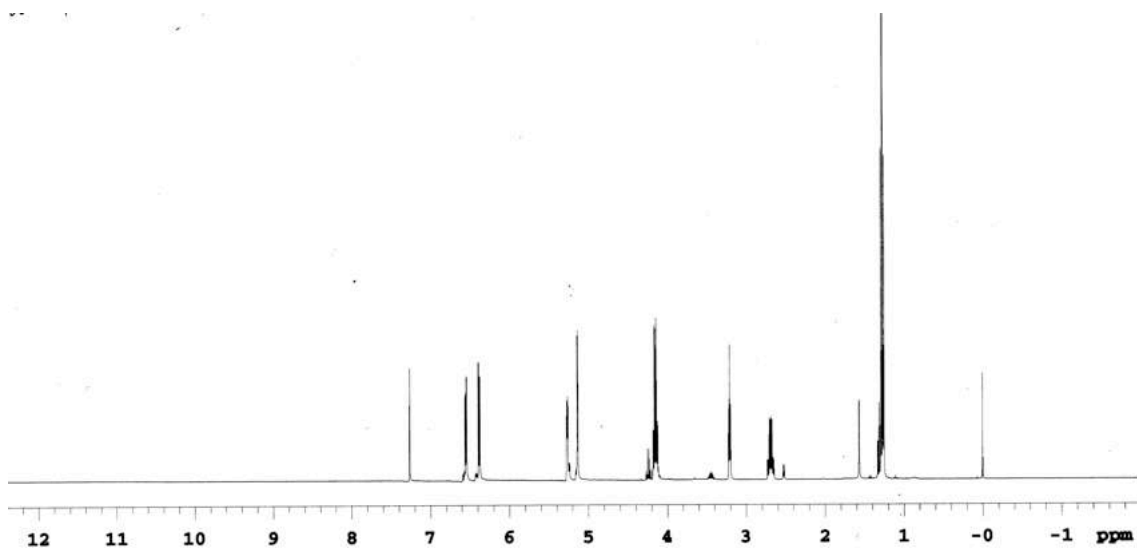

**$^{13}\text{C}$  NMR**

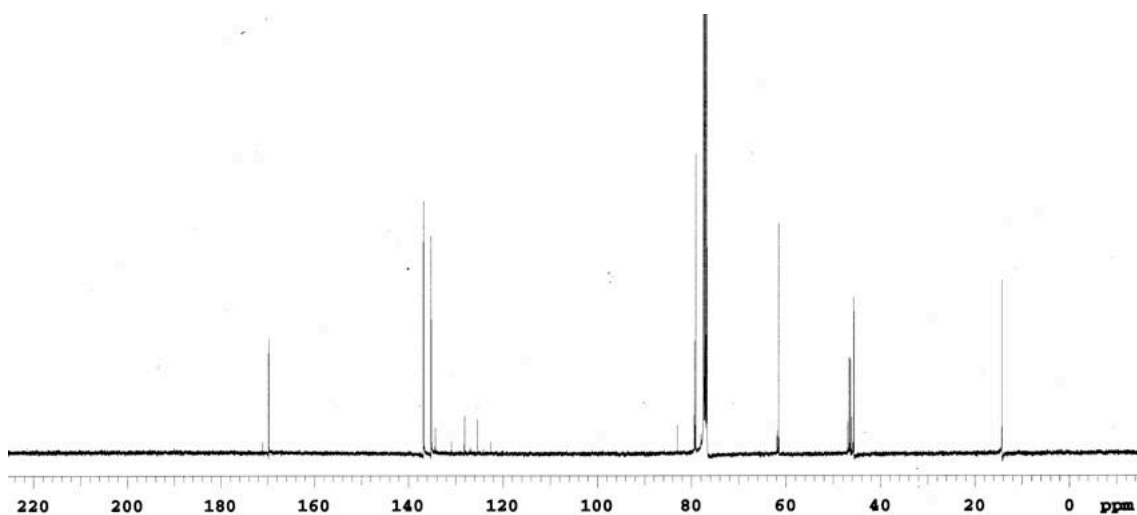

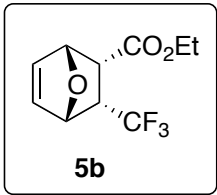

<sup>1</sup>H NMR

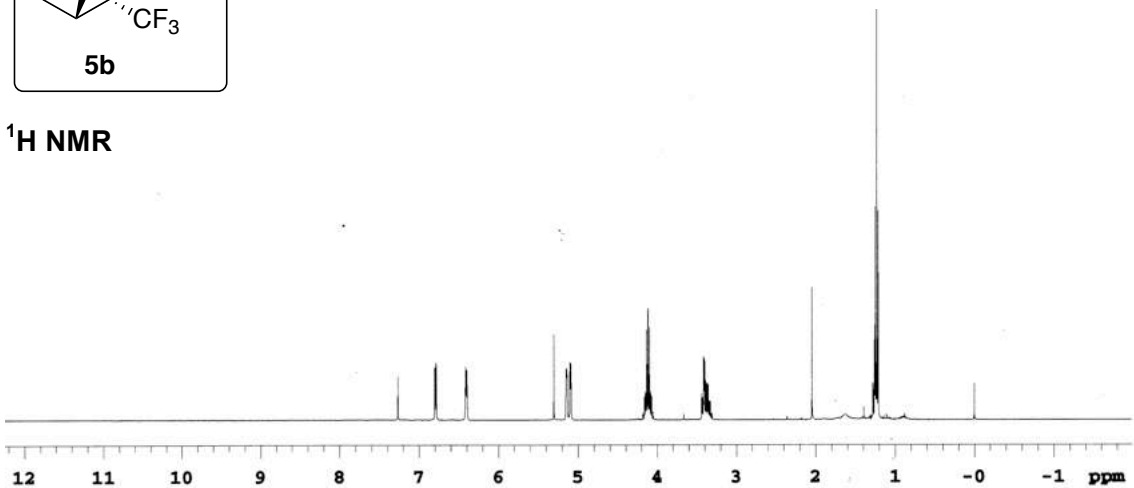

<sup>13</sup>C NMR

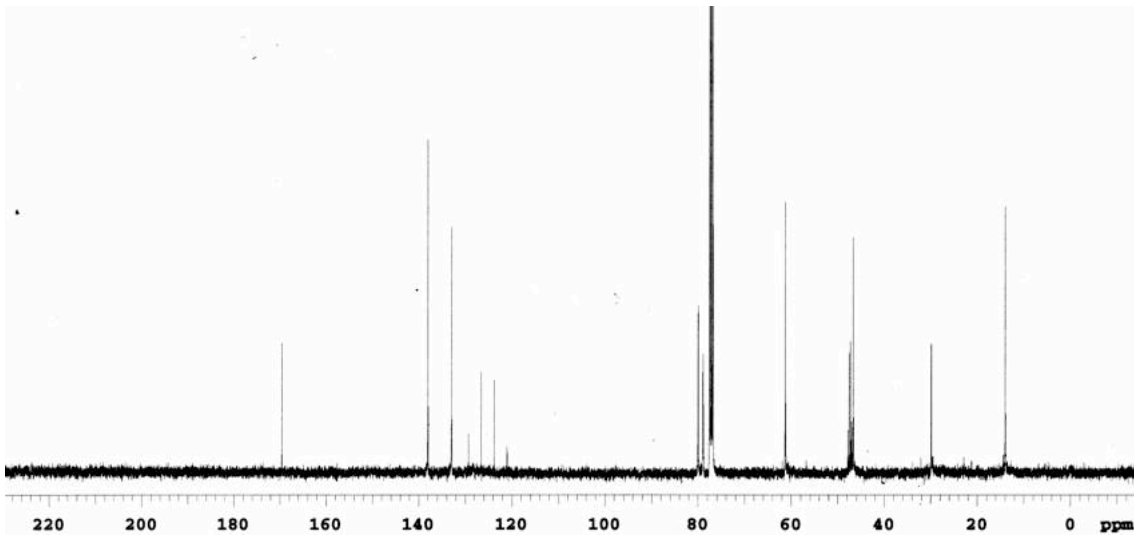

GC *racemic*

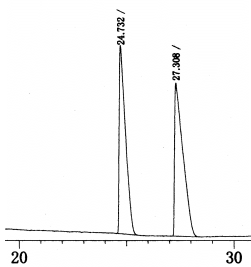

| ピーク番号 | 保持時間   | 面積     | 面積%      |
|-------|--------|--------|----------|
| 1     | 24.732 | 368080 | 47.8645  |
| 2     | 27.308 | 400924 | 52.1355  |
| 合計    |        | 769004 | 100.0000 |

GC *optically active*

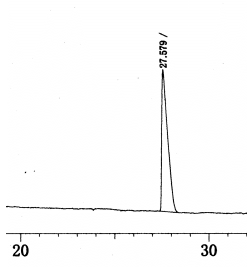

| ピーク番号 | 保持時間   | 面積     | 面積%      |
|-------|--------|--------|----------|
| 1     | 27.579 | 227282 | 100.0000 |
| 合計    |        | 227282 | 100.0000 |

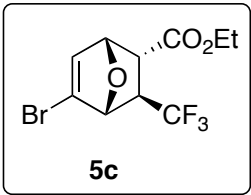

<sup>1</sup>H NMR

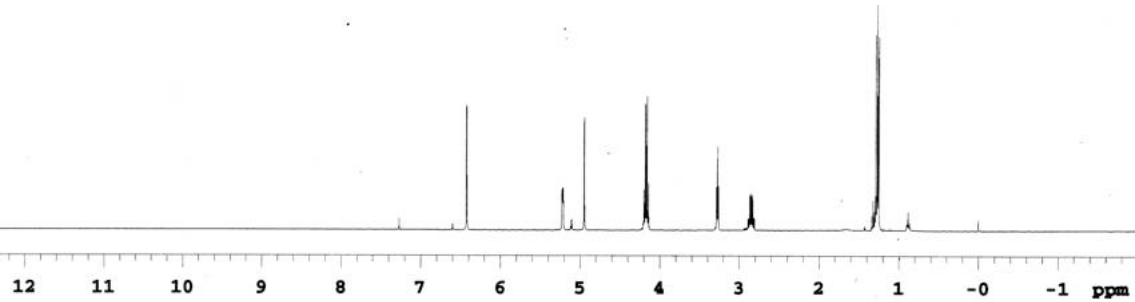

<sup>13</sup>C NMR

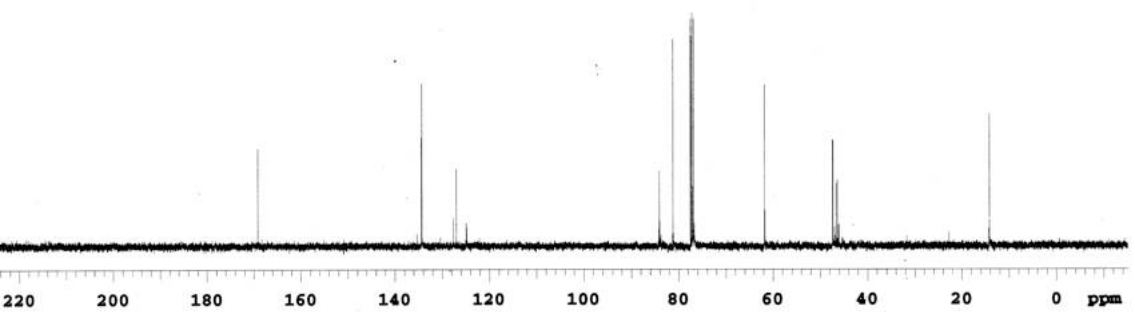

GC *racemic*

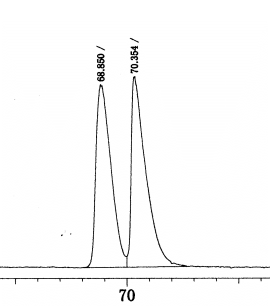

| ピーク番号 | 保持時間   | 面積      | 面積%      |
|-------|--------|---------|----------|
| 1     | 68.850 | 1444019 | 49.6016  |
| 2     | 70.354 | 1467215 | 50.3984  |
| 合計    |        | 2911234 | 100.0000 |

GC *optically active*

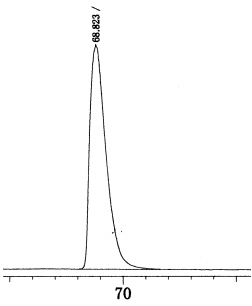

| ピーク番号 | 保持時間   | 面積      | 面積%      |
|-------|--------|---------|----------|
| 1     | 68.823 | 3128106 | 100.0000 |
| 合計    |        | 3128106 | 100.0000 |

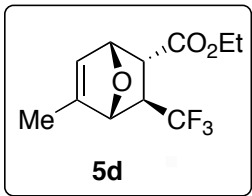

<sup>1</sup>H NMR

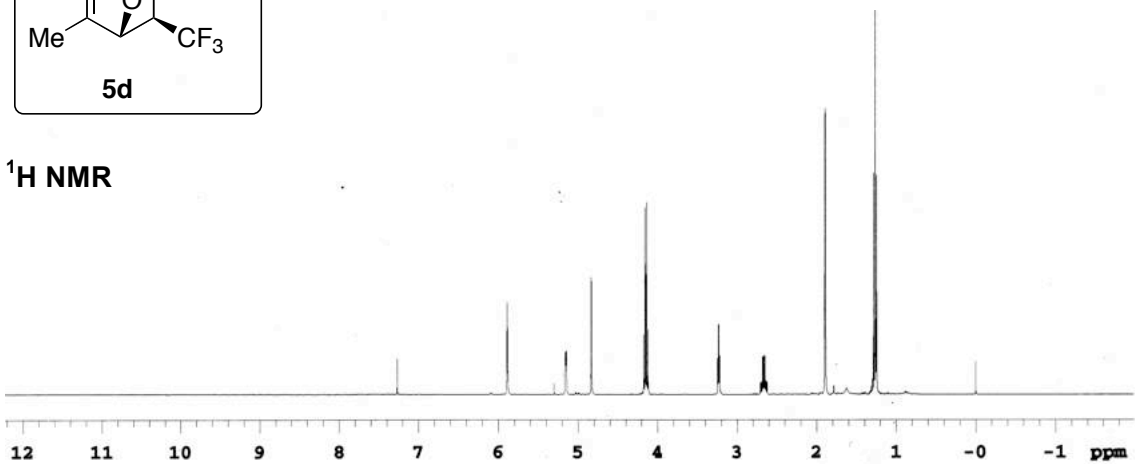

<sup>13</sup>C NMR

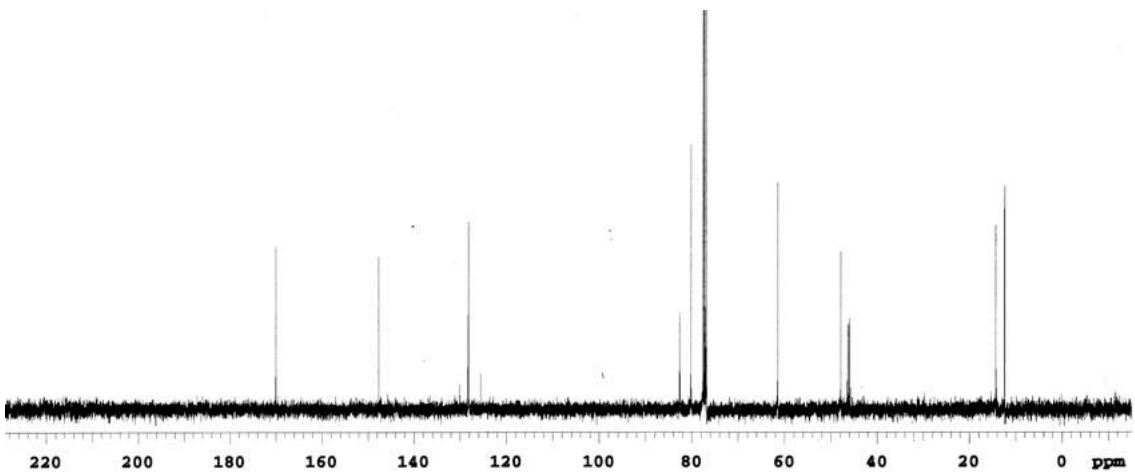

GC *racemic*

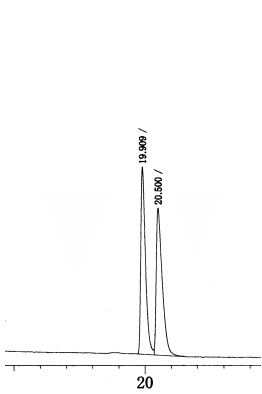

| ピーク番号 | 保持時間   | 面積      | 面積%      |
|-------|--------|---------|----------|
| 1     | 19.909 | 648674  | 50.0290  |
| 2     | 20.500 | 647921  | 49.9710  |
| 合計    |        | 1296595 | 100.0000 |

GC *optically active*

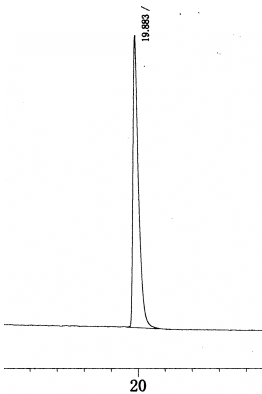

| ピーク番号 | 保持時間   | 面積      | 面積%      |
|-------|--------|---------|----------|
| 1     | 19.883 | 1069959 | 100.0000 |
| 合計    |        | 1069959 | 100.0000 |

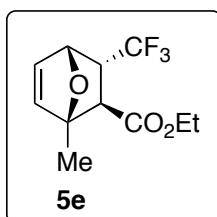

**<sup>1</sup>H NMR**

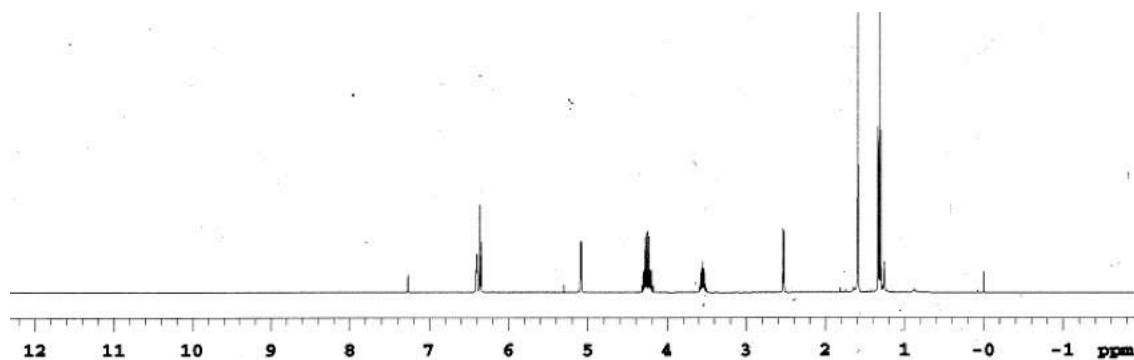

**<sup>13</sup>C NMR**

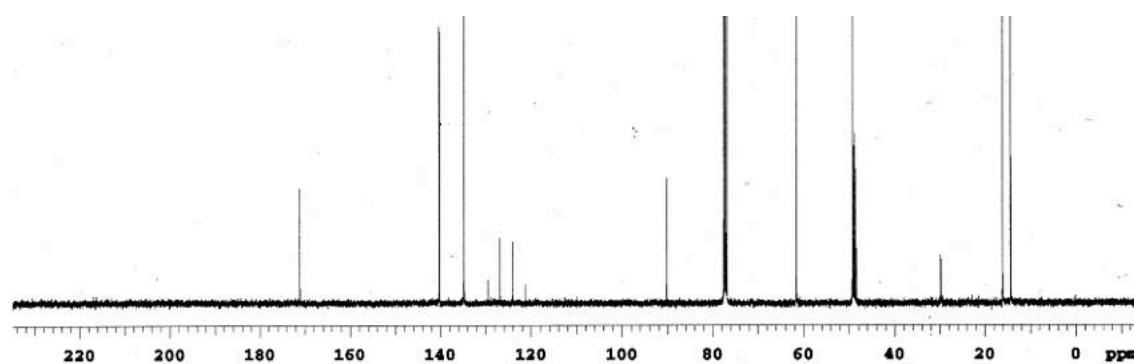

**HPLC *racemic***

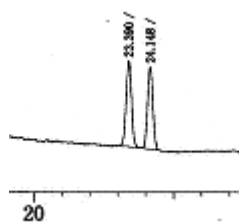

| ピーク番号 | 保持時間   | 面積     | 面積%      |
|-------|--------|--------|----------|
| 1     | 23.390 | 54600  | 51.3558  |
| 2     | 24.148 | 51717  | 48.6442  |
| 合計    |        | 106317 | 100.0000 |

**HPLC *optically active***

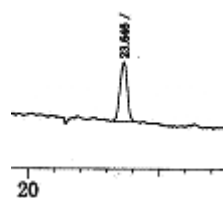

| ピーク番号 | 保持時間   | 面積    | 面積%      |
|-------|--------|-------|----------|
| 1     | 23.646 | 37553 | 100.0000 |
| 合計    |        | 37553 | 100.0000 |

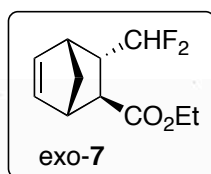

<sup>1</sup>H NMR

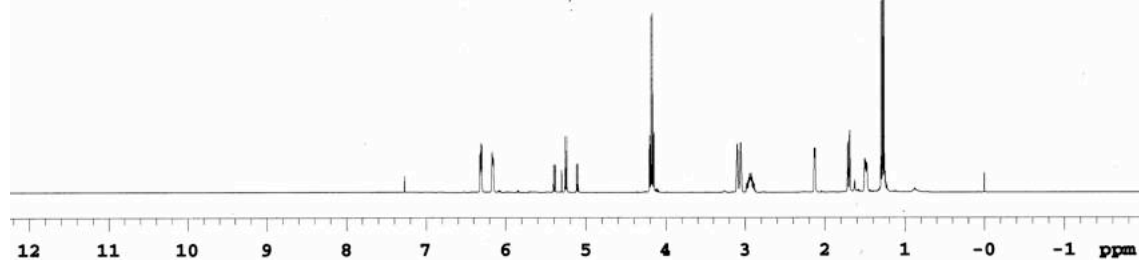

<sup>13</sup>C NMR

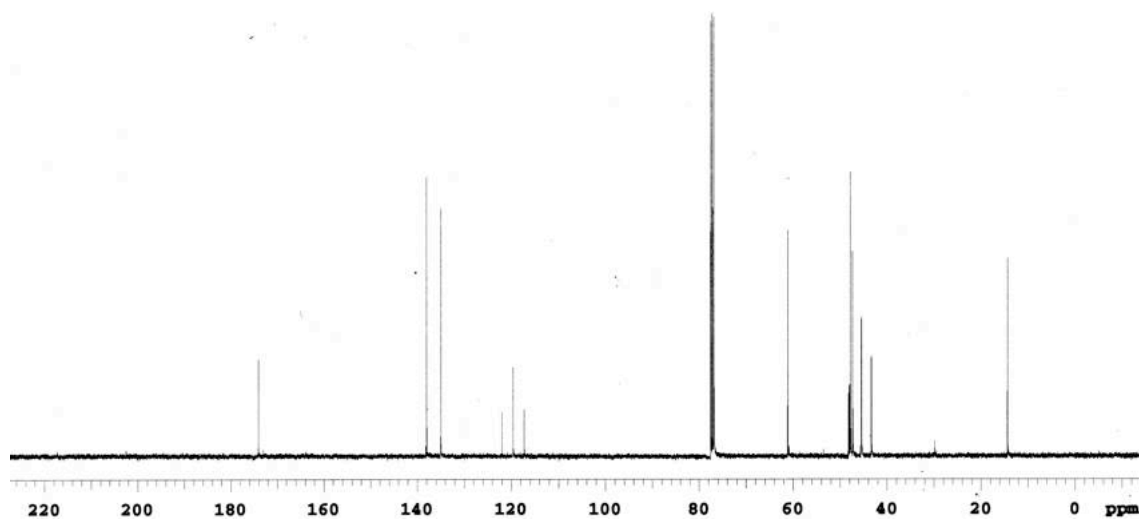

GC racemic (exo/endo = 14/86)

GC optically active

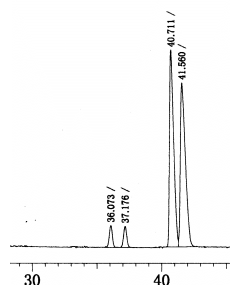

| ピーク番号 | 保持時間   | 面積      | 面積%      |
|-------|--------|---------|----------|
| 1     | 36.073 | 41942   | 3.8606   |
| 2     | 37.176 | 41450   | 3.8154   |
| 3     | 40.711 | 499273  | 45.9569  |
| 4     | 41.560 | 503728  | 46.3670  |
| 合計    |        | 1086393 | 100.0000 |

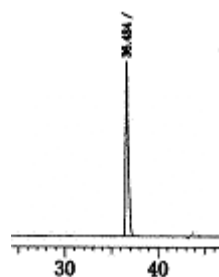

| ピーク番号 | 保持時間   | 面積      | 面積%      |
|-------|--------|---------|----------|
| 1     | 36.484 | 2971050 | 100.0000 |
| 合計    |        | 2971050 | 100.0000 |

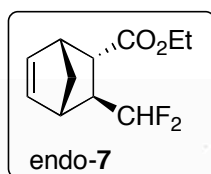

<sup>1</sup>H NMR

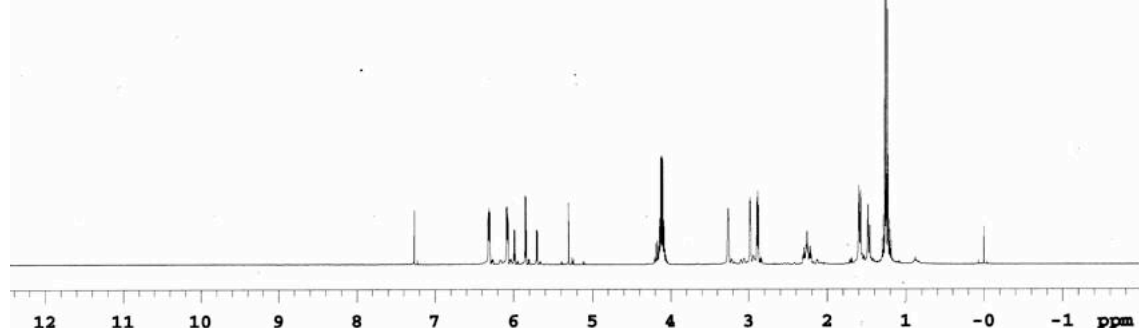

<sup>13</sup>C NMR

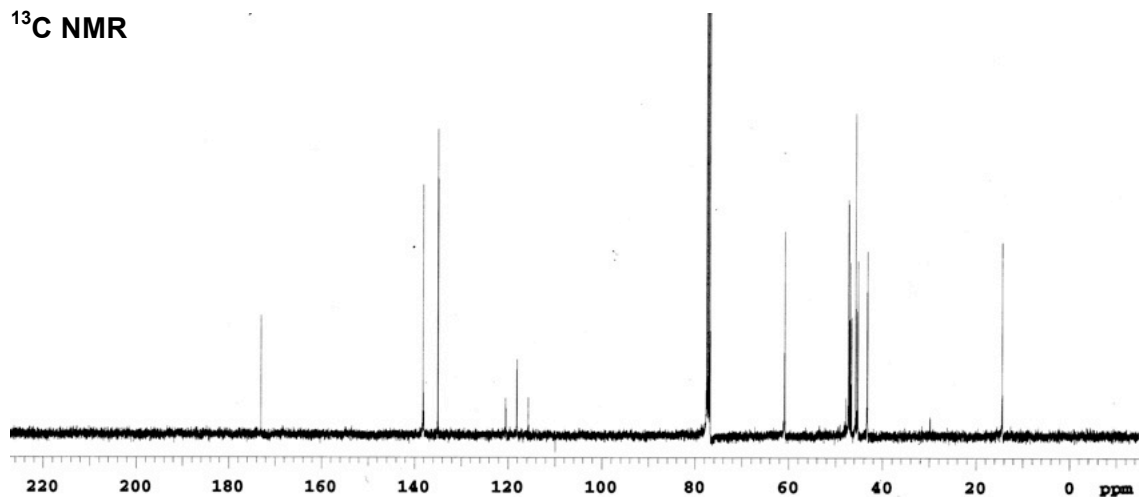

**GC racemic**

(exo/endo = 14/86)

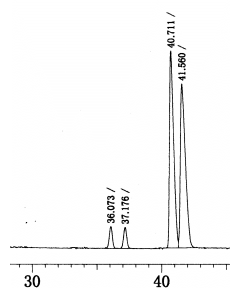

| ピーク番号 | 保持時間   | 面積      | 面積%      |
|-------|--------|---------|----------|
| 1     | 36.073 | 41942   | 3.8606   |
| 2     | 37.176 | 41450   | 3.8154   |
| 3     | 40.711 | 499273  | 45.9569  |
| 4     | 41.560 | 503728  | 46.3670  |
| 合計    |        | 1086393 | 100.0000 |

**GC optically active**

(contains small amount of exo isomer)

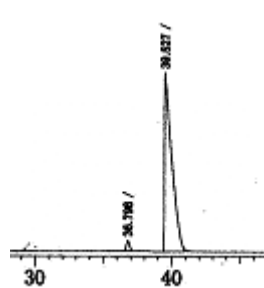

| ピーク番号 | 保持時間   | 面積      | 面積%      |
|-------|--------|---------|----------|
| 1     | 36.798 | 77495   | 2.6578   |
| 2     | 39.527 | 2838253 | 97.3422  |
| 合計    |        | 2915748 | 100.0000 |



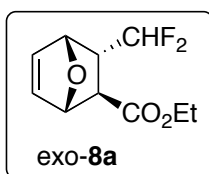

<sup>1</sup>H NMR

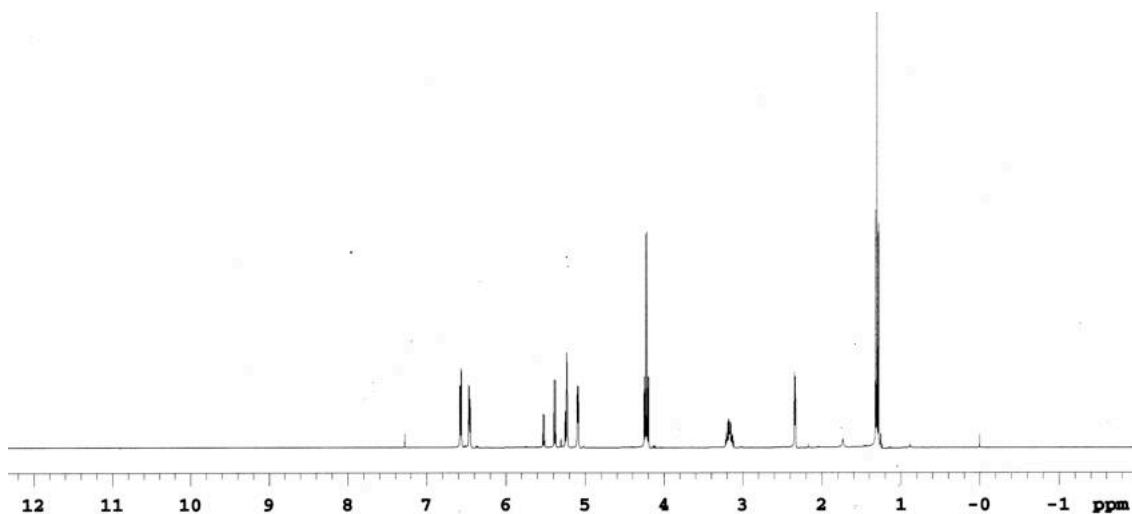

<sup>13</sup>C NMR

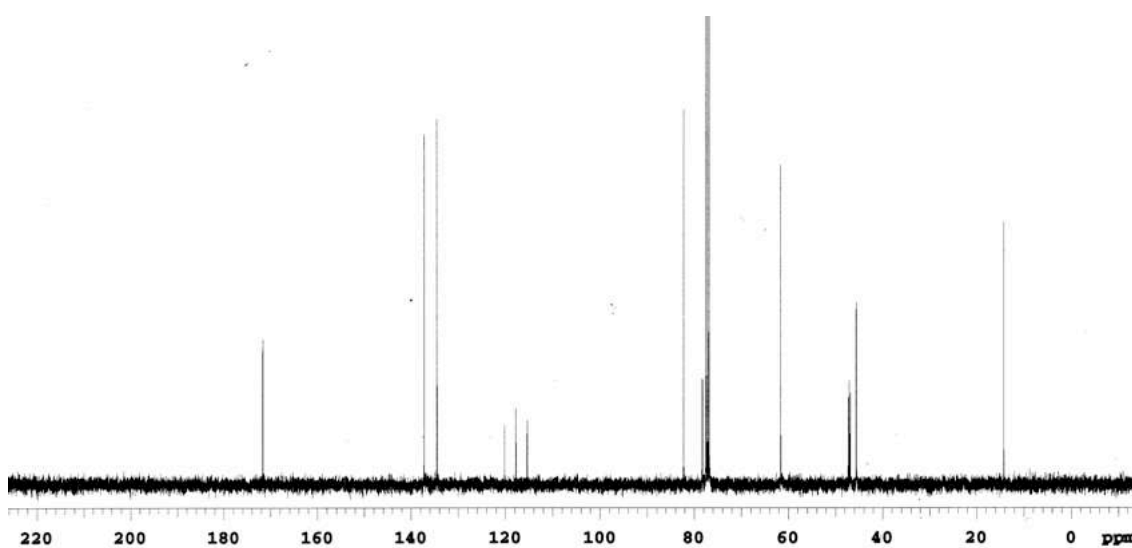

Ee was determined after converted into **21**.

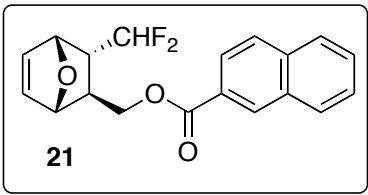

<sup>1</sup>H NMR

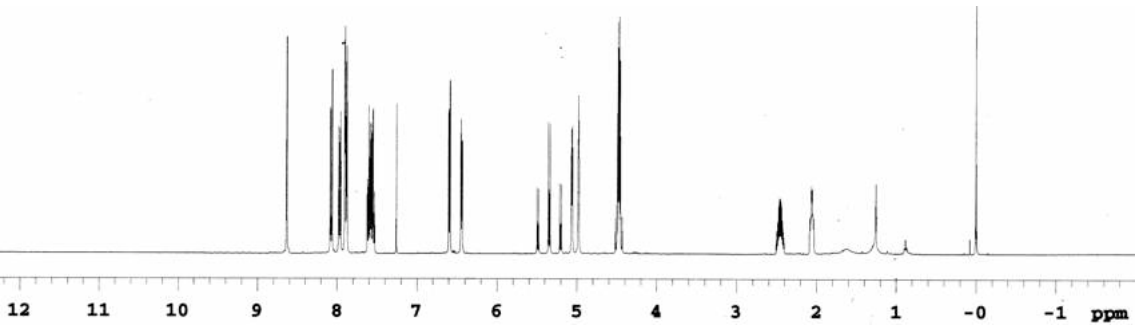

<sup>13</sup>C NMR

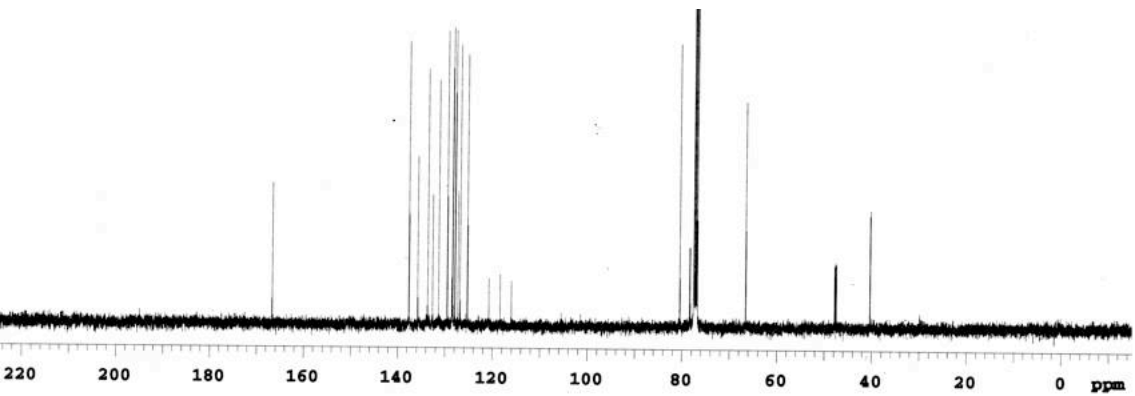

HPLC *racemic*

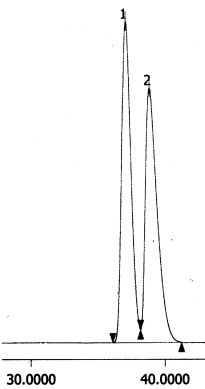

ピーク情報

| # | ピーク名    | CH | tR [min] | 面積 [μV·sec] | 高さ [μV] | 面積%    | 高さ%    |
|---|---------|----|----------|-------------|---------|--------|--------|
| 1 | Unknown | 1  | 37.025   | 4169464     | 86235   | 49.840 | 55.804 |
| 2 | Unknown | 1  | 38.792   | 4196180     | 68297   | 50.160 | 44.196 |

HPLC *optically active*

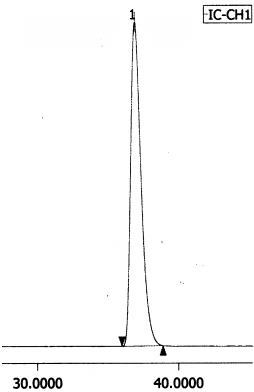

ピーク情報

| # | ピーク名    | CH | tR [min] | 面積 [μV·sec] | 高さ [μV] | 面積%     | 高さ%     |
|---|---------|----|----------|-------------|---------|---------|---------|
| 1 | Unknown | 1  | 36.875   | 5161368     | 100561  | 100.000 | 100.000 |

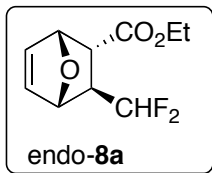

<sup>1</sup>H NMR

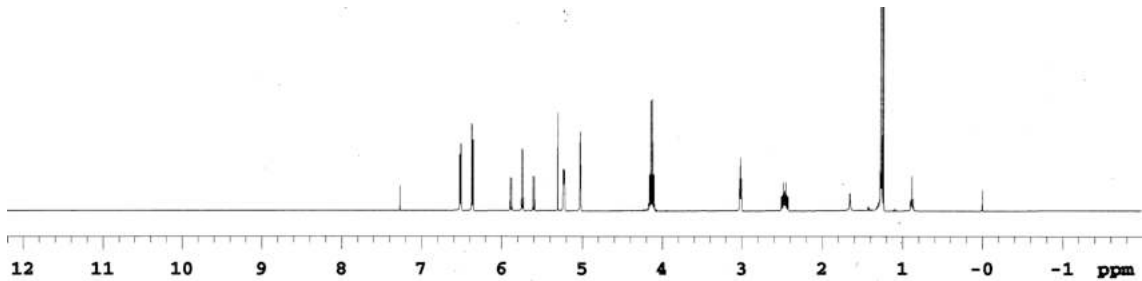

<sup>13</sup>C NMR

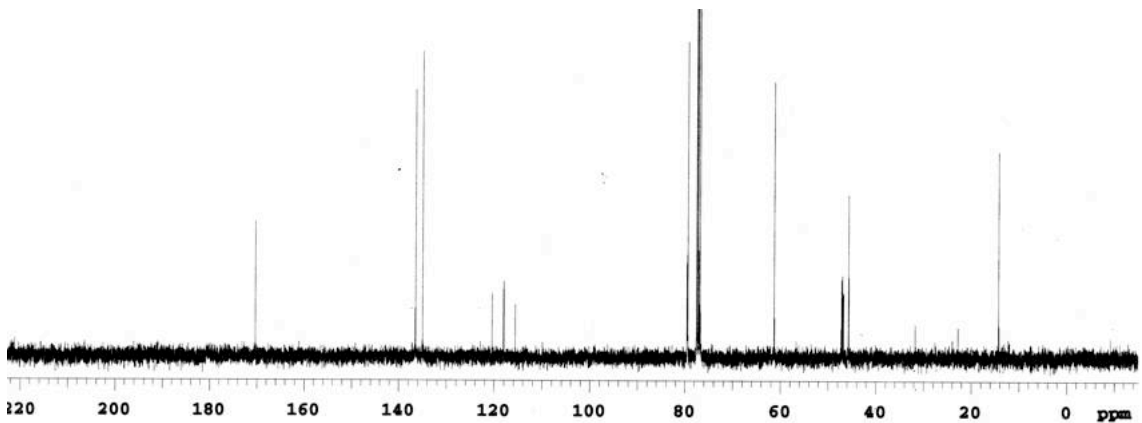

GC *racemic*

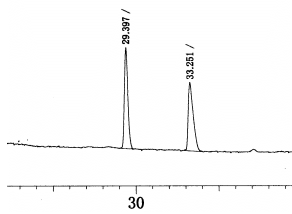

| ピーク番号 | 保持時間   | 面積     | 面積%      |
|-------|--------|--------|----------|
| 1     | 29.397 | 89019  | 50.9708  |
| 2     | 33.251 | 85628  | 49.0292  |
| 合計    |        | 174647 | 100.0000 |

GC *optically active*

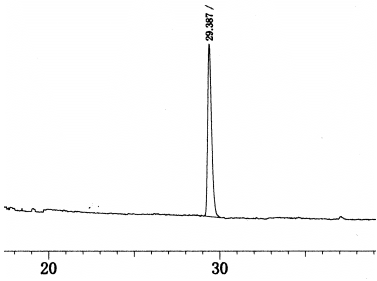

| ピーク番号 | 保持時間   | 面積     | 面積%      |
|-------|--------|--------|----------|
| 1     | 29.387 | 164602 | 100.0000 |
| 合計    |        | 164602 | 100.0000 |

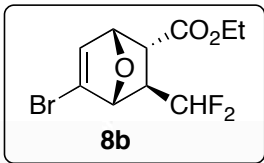

<sup>1</sup>H NMR

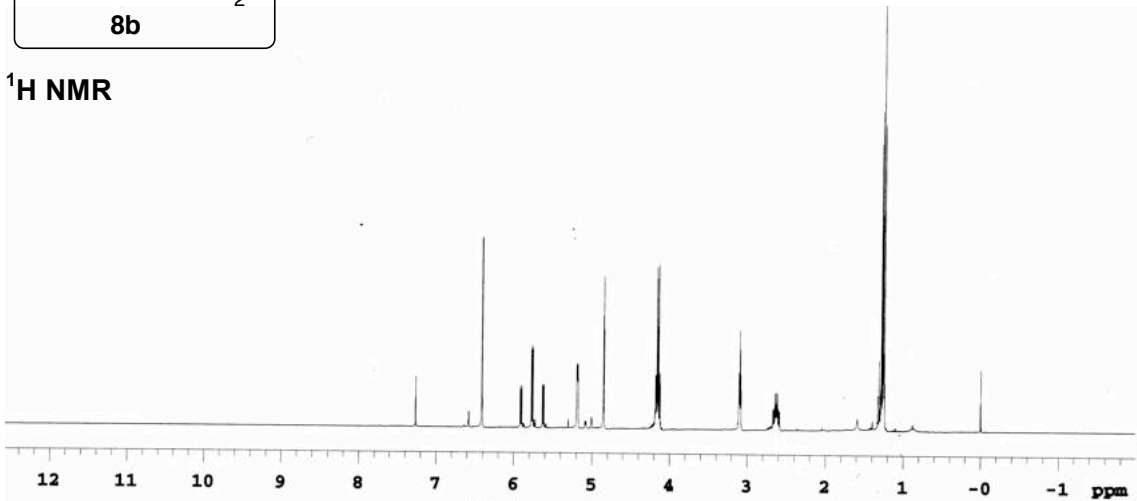

<sup>13</sup>C NMR

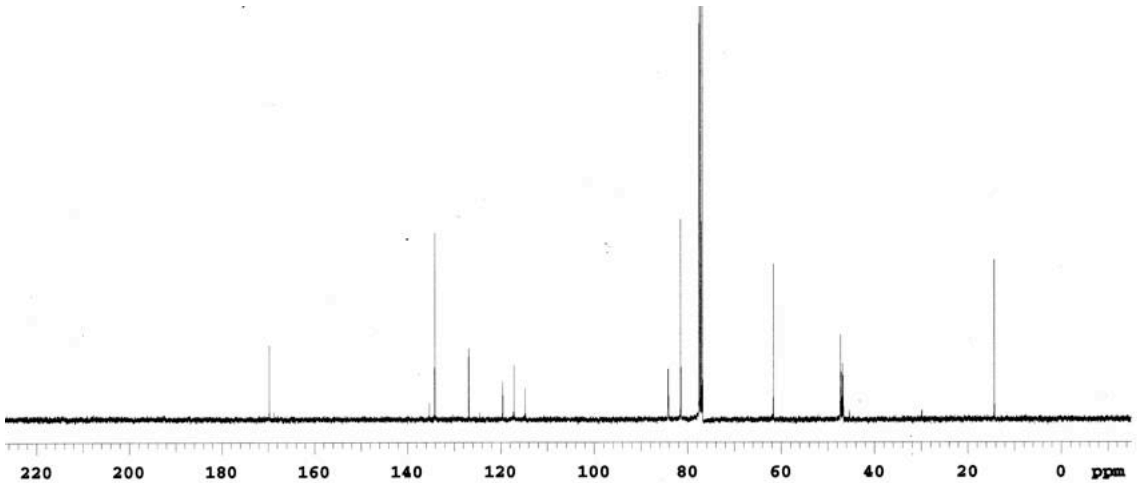

GC racemic

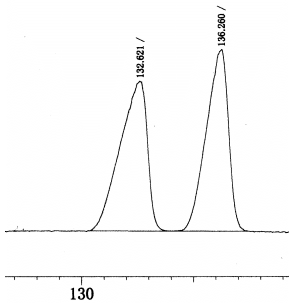

| ピーク番号 | 保持時間    | 面積      | 面積%      |
|-------|---------|---------|----------|
| 1     | 132.621 | 761722  | 50.3610  |
| 2     | 136.260 | 750802  | 49.6390  |
| 合計    |         | 1512524 | 100.0000 |

GC optically active

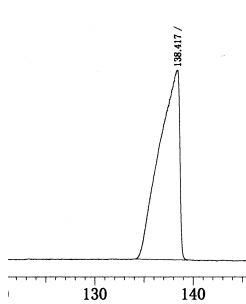

| ピーク番号 | 保持時間    | 面積      | 面積%      |
|-------|---------|---------|----------|
| 1     | 138.417 | 3874919 | 100.0000 |
| 合計    |         | 3874919 | 100.0000 |

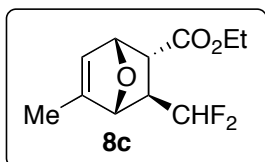

<sup>1</sup>H NMR

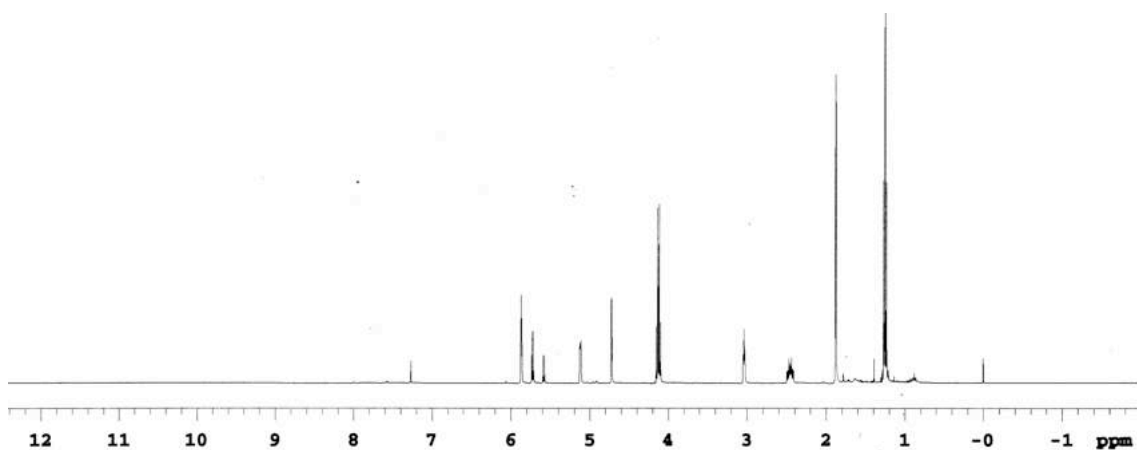

<sup>13</sup>C NMR

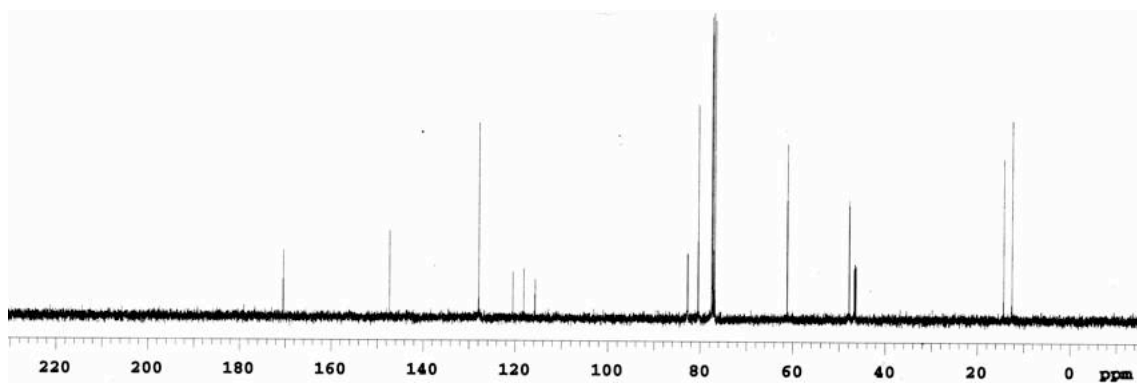

Ee was determined after converted into **22**.

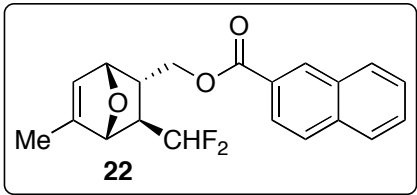

<sup>1</sup>H NMR

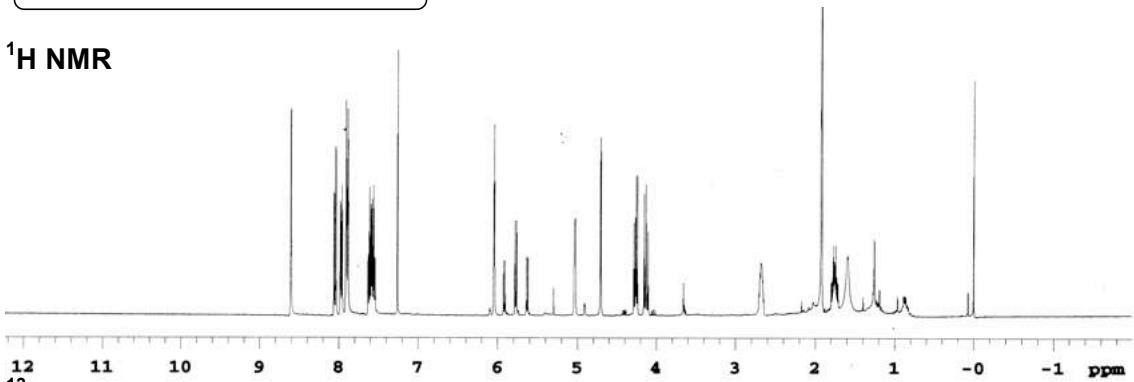

<sup>13</sup>C NMR

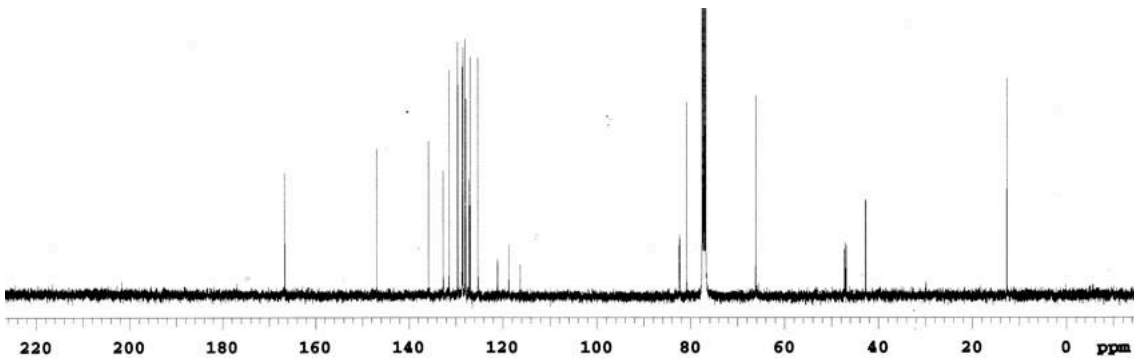

**HPLC *racemic***  
(contains 47% of regio isomer)

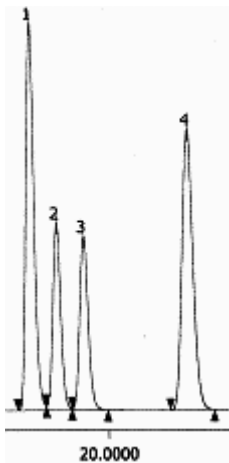

ピーク情報

| # | ピーク名    | CH | tR [min] | 面積 [μVsec] | 高さ [μV] | 面積%    | 高さ%    |
|---|---------|----|----------|------------|---------|--------|--------|
| 3 | Unknown | 1  | 16.325   | 3069739    | 122590  | 33.759 | 37.681 |
| 4 | Unknown | 1  | 17.597   | 1490545    | 59136   | 16.282 | 18.178 |
| 5 | Unknown | 1  | 18.808   | 1474043    | 54858   | 16.211 | 16.863 |
| 6 | Unknown | 1  | 23.597   | 3069668    | 88738   | 33.748 | 27.278 |

**HPLC *optically active***  
(contains small amount of regio isomer)

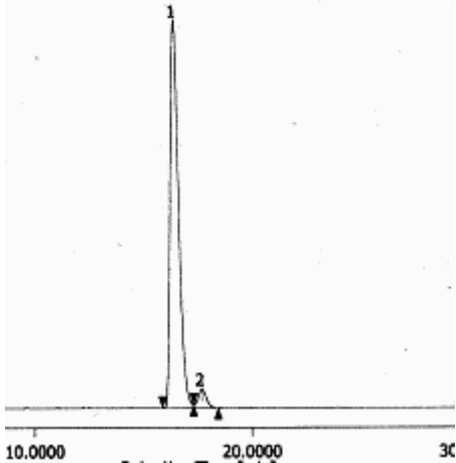

ピーク情報

| # | ピーク名    | CH | tR [min] | 面積 [μVsec] | 高さ [μV] | 面積%    | 高さ%    |
|---|---------|----|----------|------------|---------|--------|--------|
| 3 | Unknown | 1  | 16.383   | 7374209    | 280438  | 95.379 | 95.385 |
| 2 | Unknown | 1  | 17.675   | 357512     | 13578   | 4.624  | 4.615  |

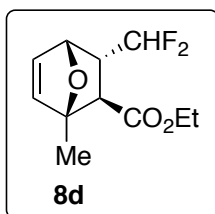

**<sup>1</sup>H NMR**

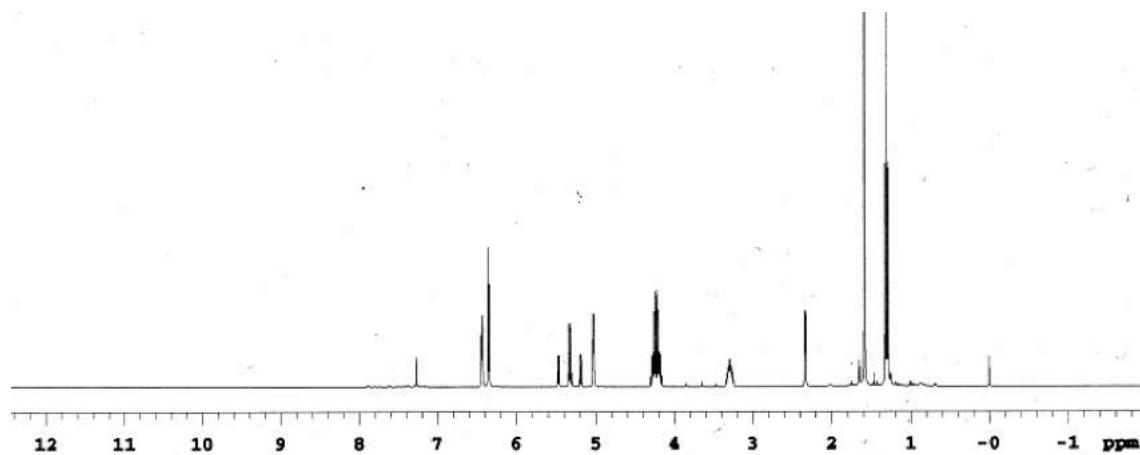

**<sup>13</sup>C NMR**

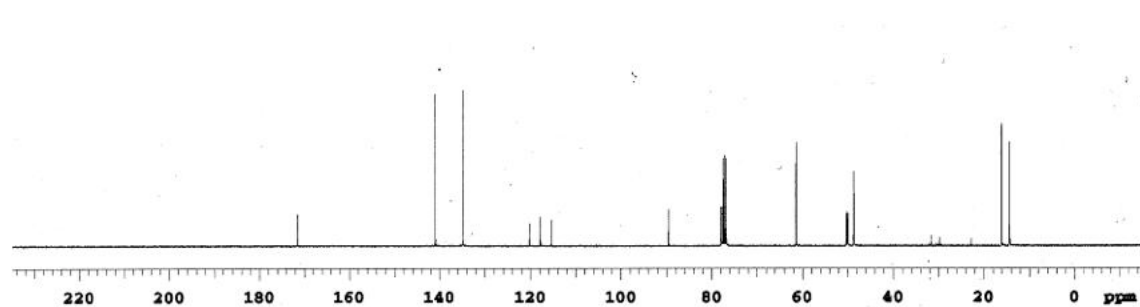

Ee was determined after converted into **23**.

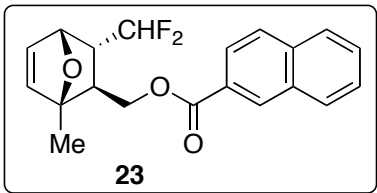

<sup>1</sup>H NMR

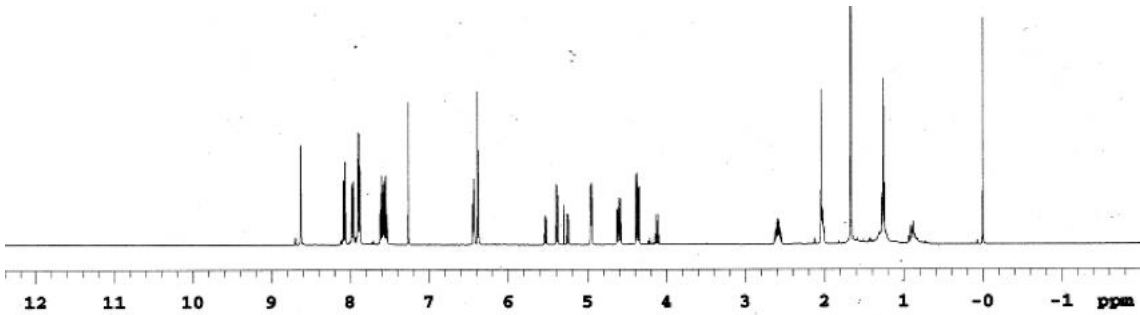

<sup>13</sup>C NMR

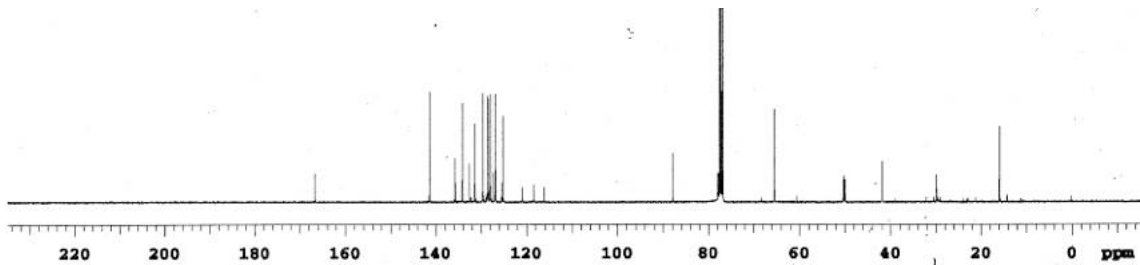

HPLC *racemic*

HPLC *optically active*

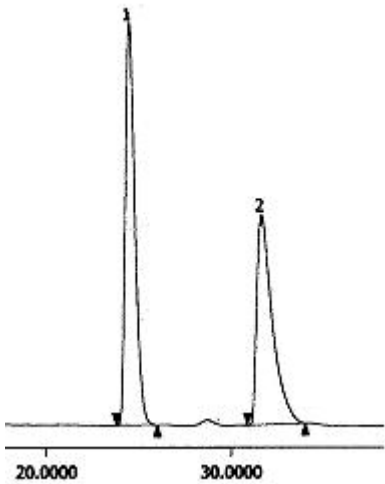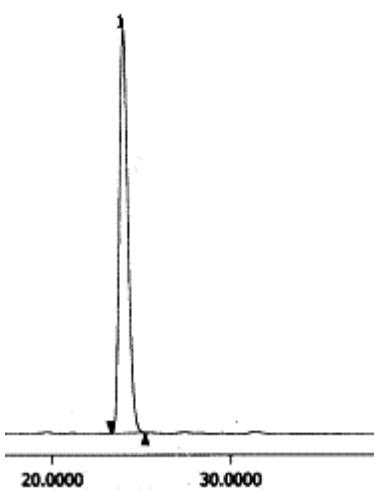

ピーク情報

| ピーク番号   | CH | 時間     | 面積      | 強度     | 純度     |
|---------|----|--------|---------|--------|--------|
| Unknown | 1  | 24.488 | 9262742 | 257417 | 54.100 |
| Unknown | 1  | 31.817 | 7856260 | 134500 | 45.892 |

ピーク情報

| ピーク番号   | CH | 時間     | 面積      | 強度     | 純度      |
|---------|----|--------|---------|--------|---------|
| Unknown | 1  | 23.950 | 3703710 | 110648 | 100.000 |



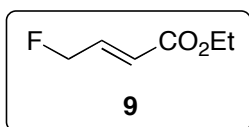

**<sup>1</sup>H NMR**

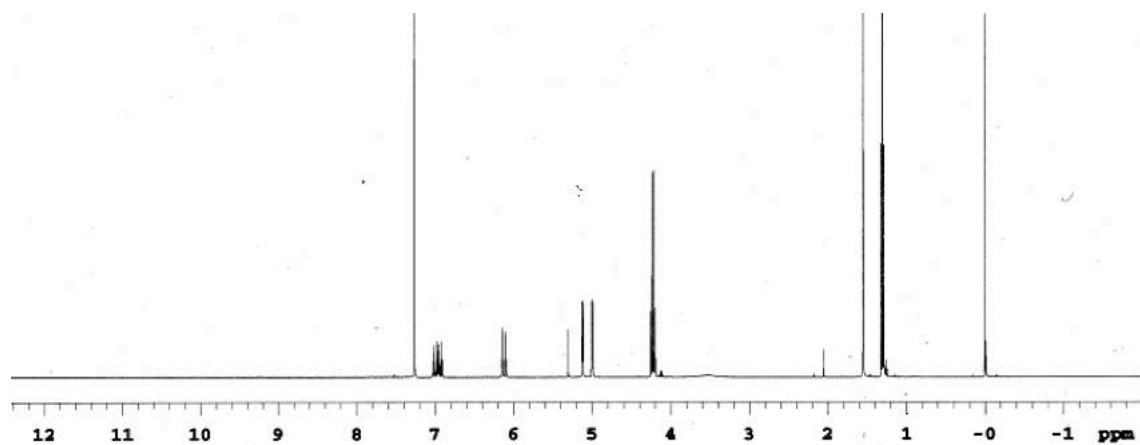

**<sup>13</sup>C NMR**

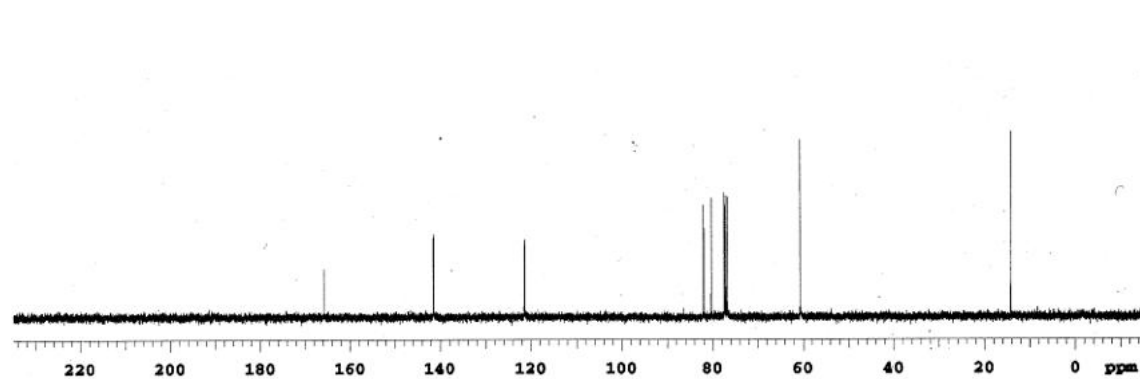

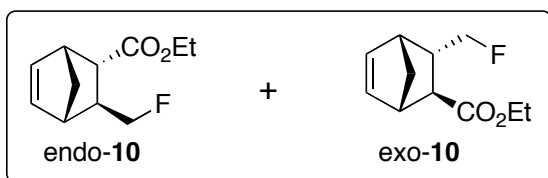

<sup>1</sup>H NMR

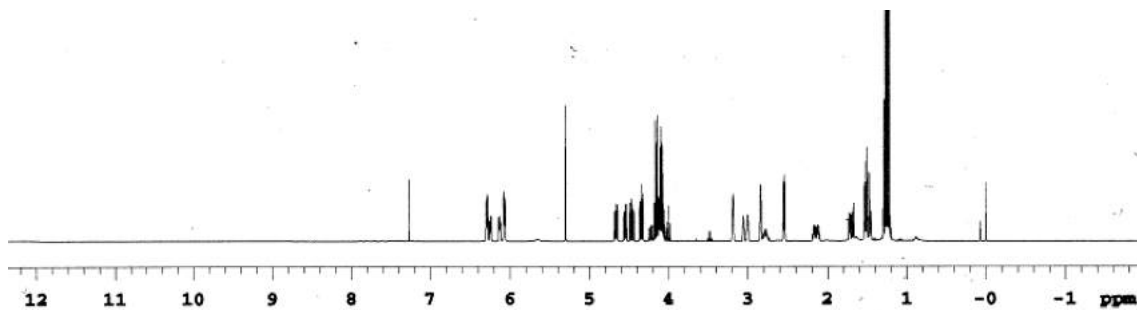

<sup>13</sup>C NMR

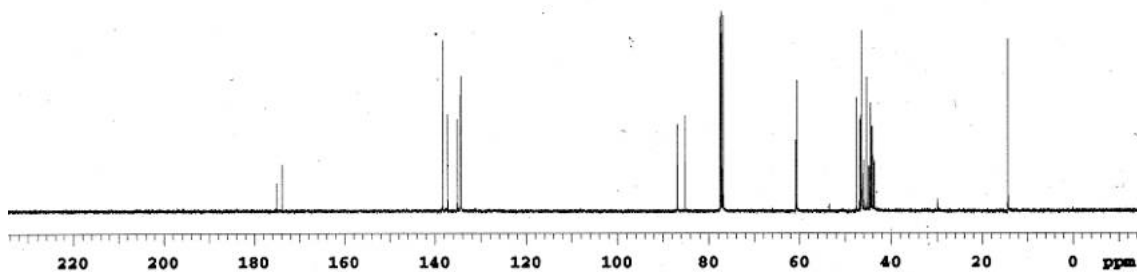

Ee was determined after converted into **26**.

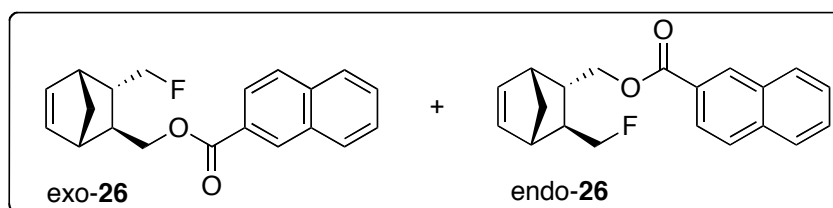

<sup>1</sup>H NMR

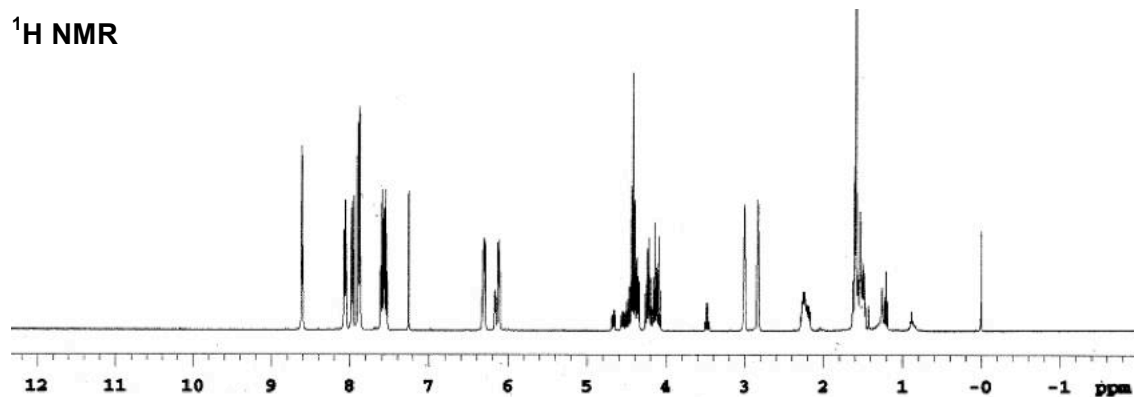

<sup>13</sup>C NMR

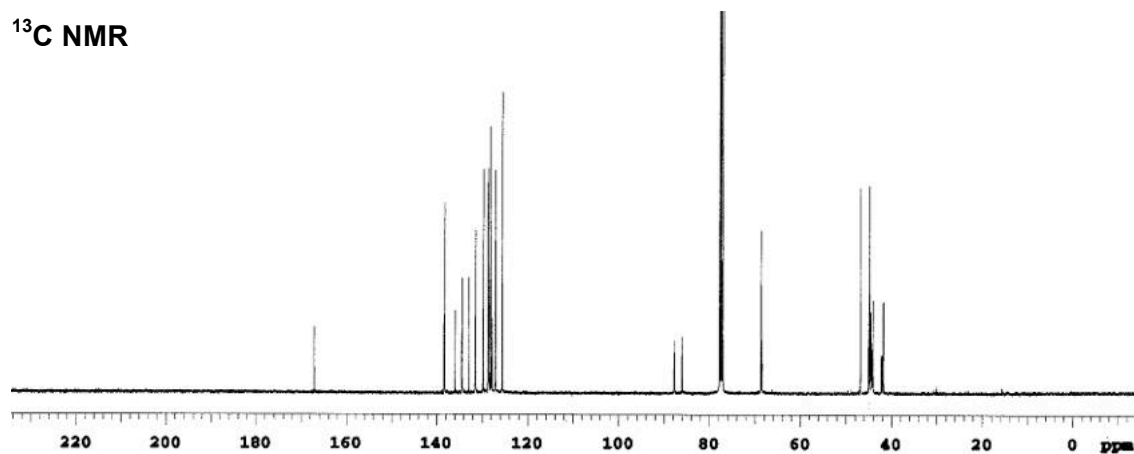

HPLC *racemic*

(exo/endo = 72/28)

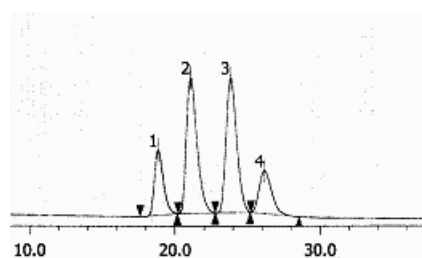

| # | ピーク名    | CH | tR [min] | 面積 [μV·sec] | 高さ [μV] | 面積%    |
|---|---------|----|----------|-------------|---------|--------|
| 1 | Unknown | 1  | 18.833   | 286277      | 6713    | 14.607 |
| 2 | Unknown | 1  | 21.058   | 701939      | 14028   | 35.815 |
| 3 | Unknown | 1  | 23.817   | 703844      | 13908   | 35.912 |
| 4 | Unknown | 1  | 26.150   | 267845      | 4455    | 13.666 |

HPLC *optically active*

(exo/endo = 34/66)

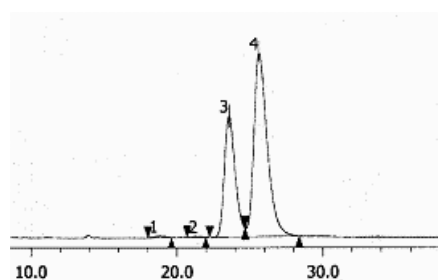

| # | ピーク名    | CH | tR [min] | 面積 [μV·sec] | 高さ [μV] | 面積%    |
|---|---------|----|----------|-------------|---------|--------|
| 1 | Unknown | 1  | 18.733   | 8390        | 173     | 0.453  |
| 2 | Unknown | 1  | 21.425   | 2957        | 84      | 0.160  |
| 3 | Unknown | 1  | 23.558   | 641992      | 12412   | 34.632 |
| 4 | Unknown | 1  | 25.625   | 1200442     | 18786   | 64.756 |

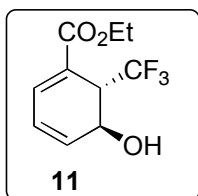

**<sup>1</sup>H NMR**

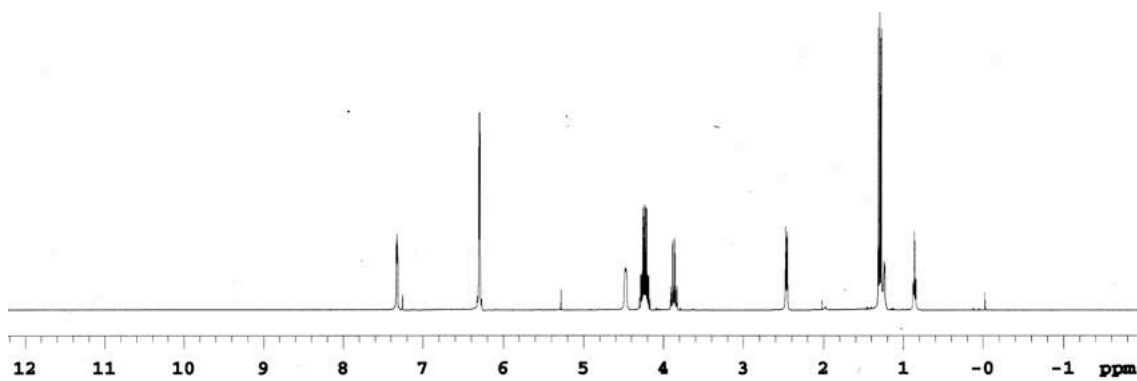

**<sup>13</sup>C NMR**

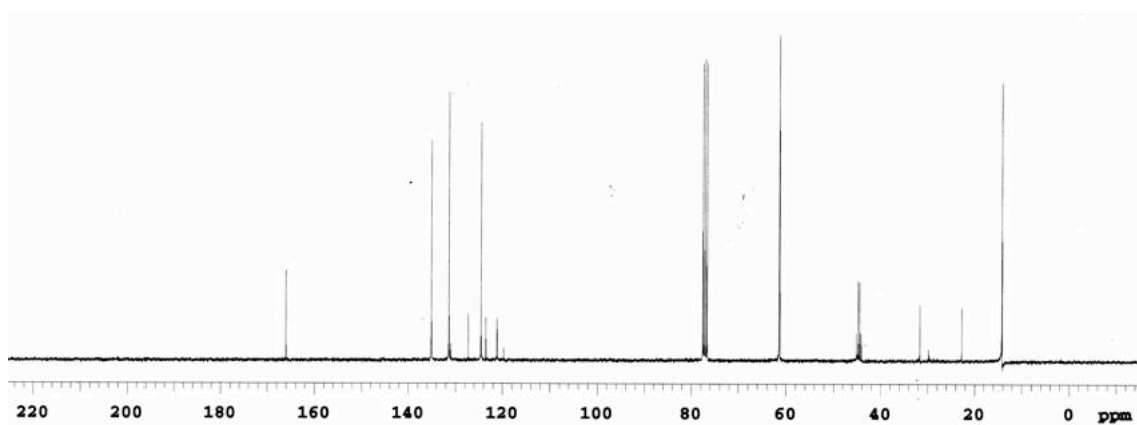

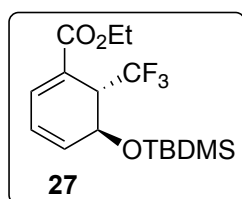

**$^1\text{H}$  NMR**

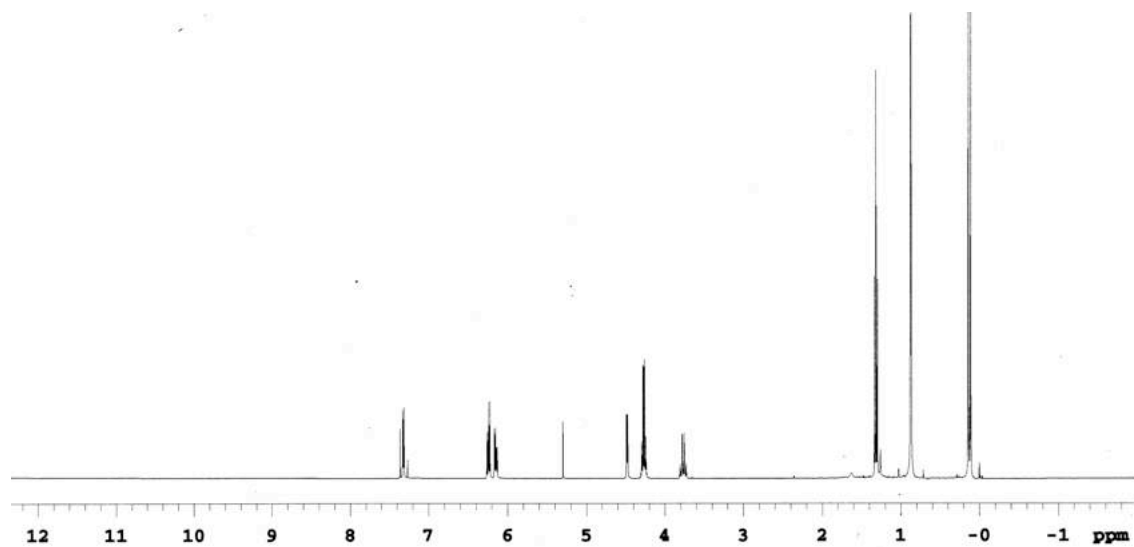

**$^{13}\text{C}$  NMR**

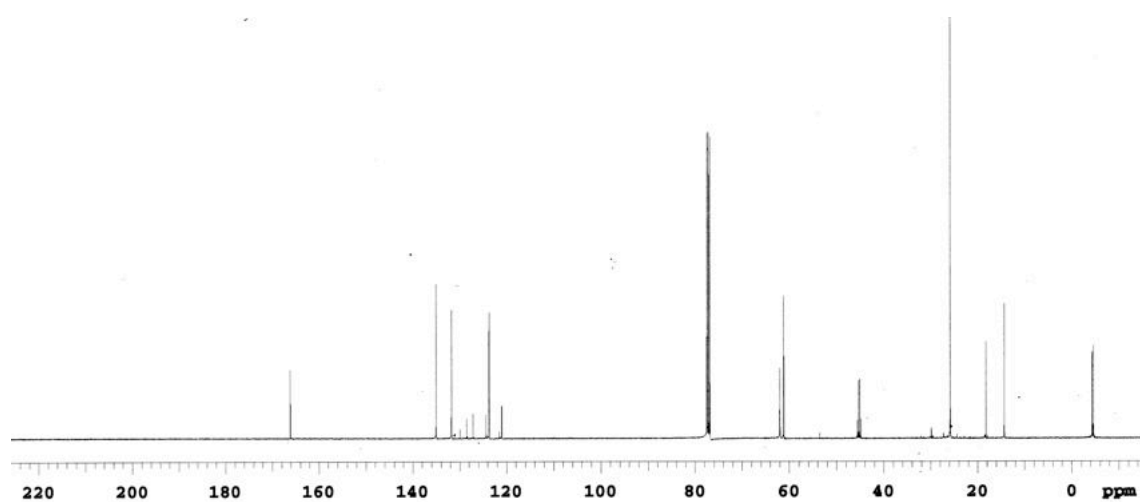

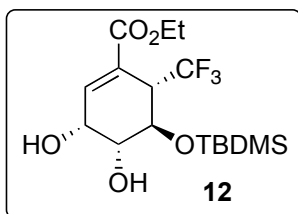

**$^1\text{H}$  NMR**

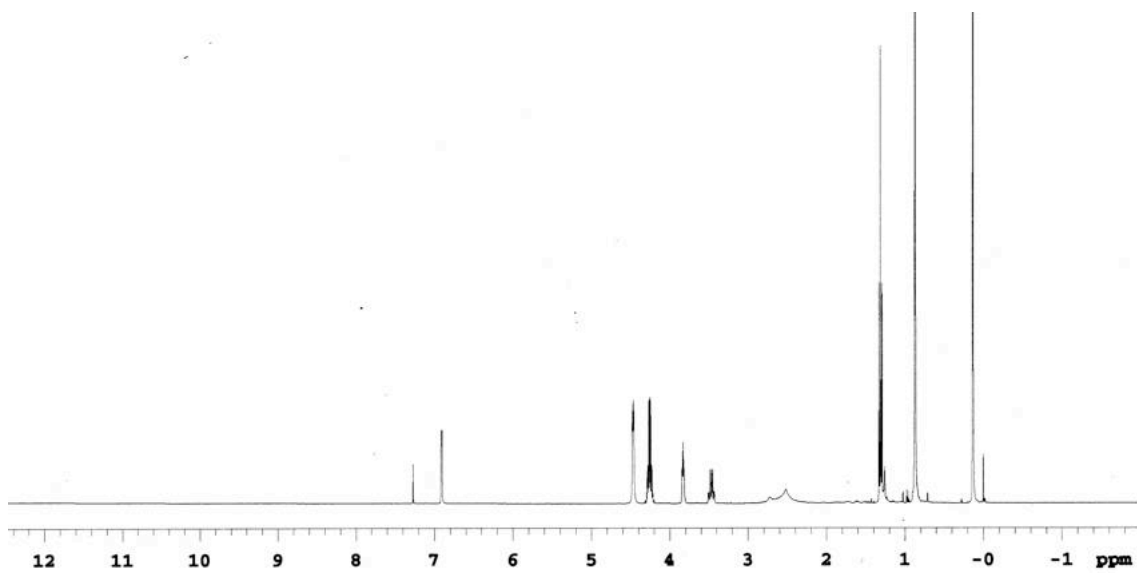

**$^{13}\text{C}$  NMR**

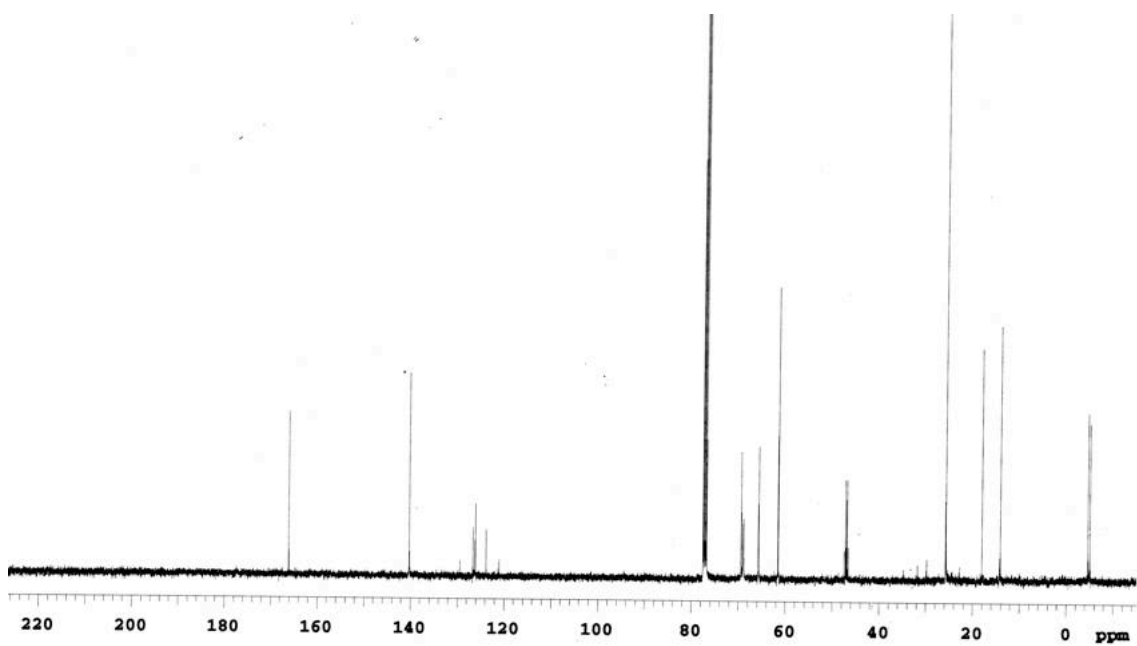

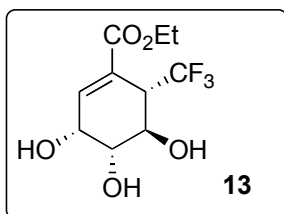

**$^1\text{H}$  NMR**

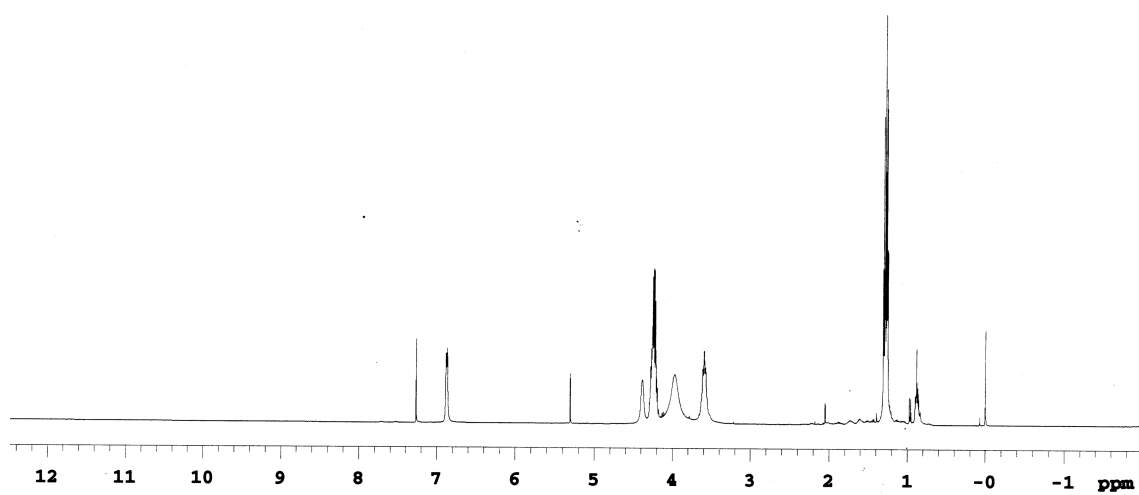

**$^{13}\text{C}$  NMR**

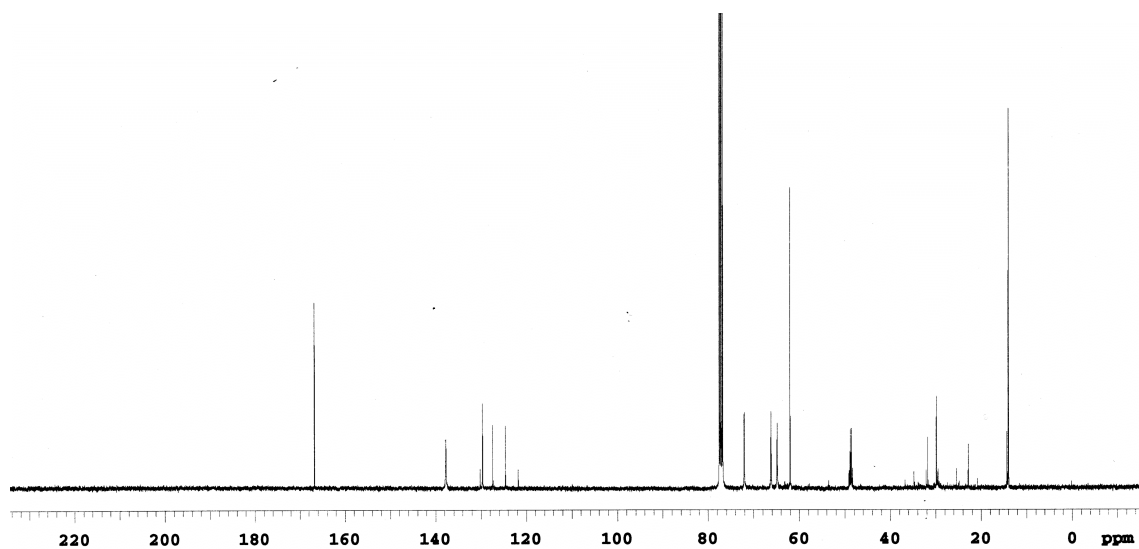

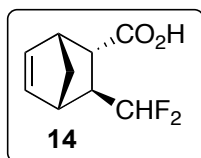

**$^1\text{H}$  NMR**

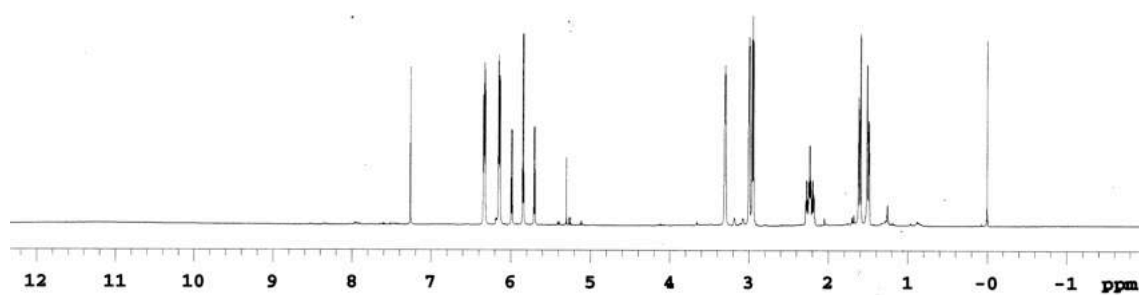

**$^{13}\text{C}$  NMR**

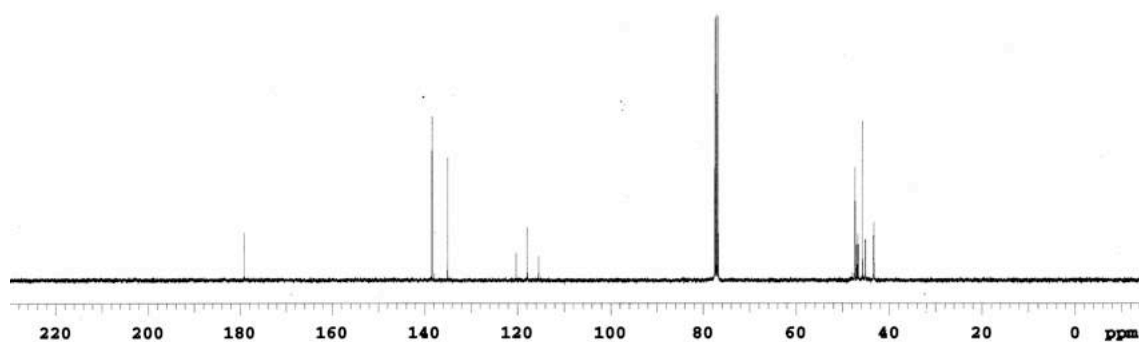



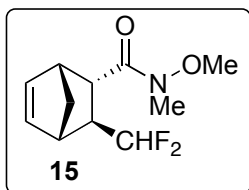

**$^1\text{H}$  NMR**

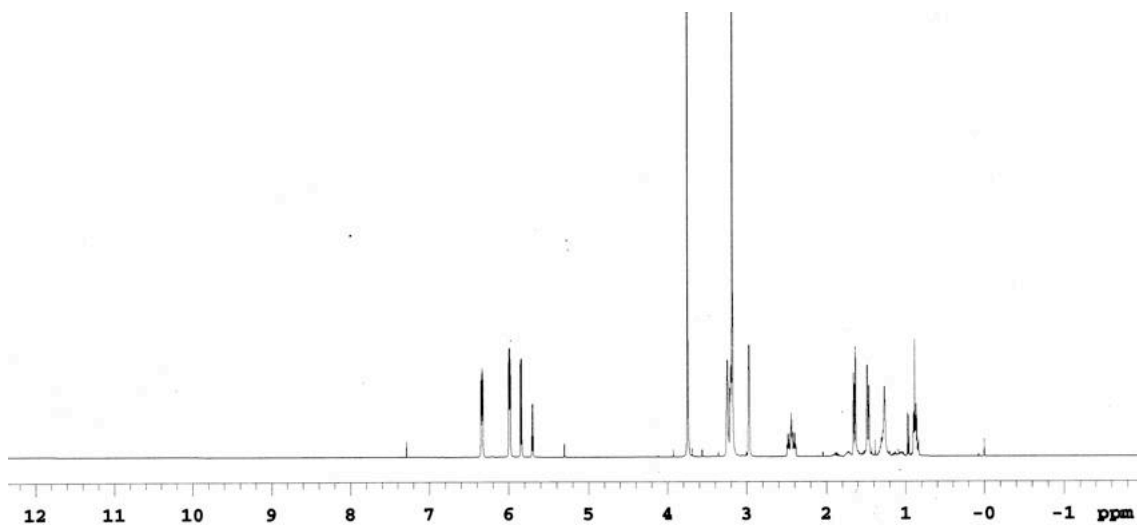

**$^{13}\text{C}$  NMR**

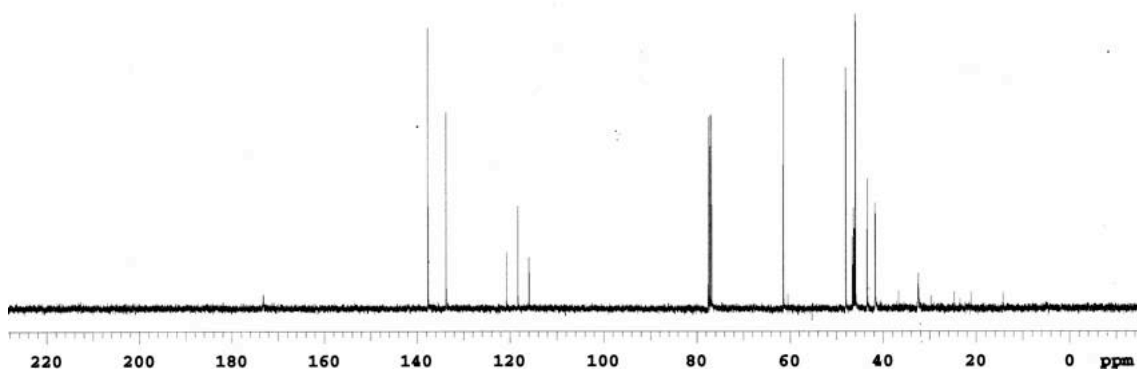

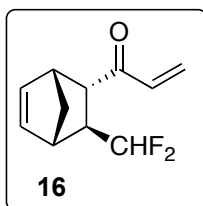

**<sup>1</sup>H NMR**

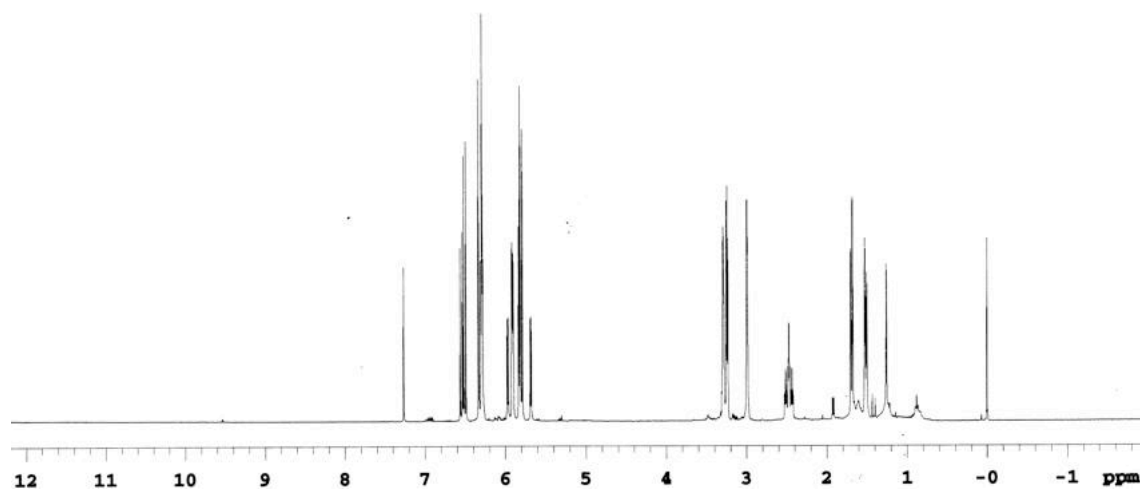

**<sup>13</sup>C NMR**

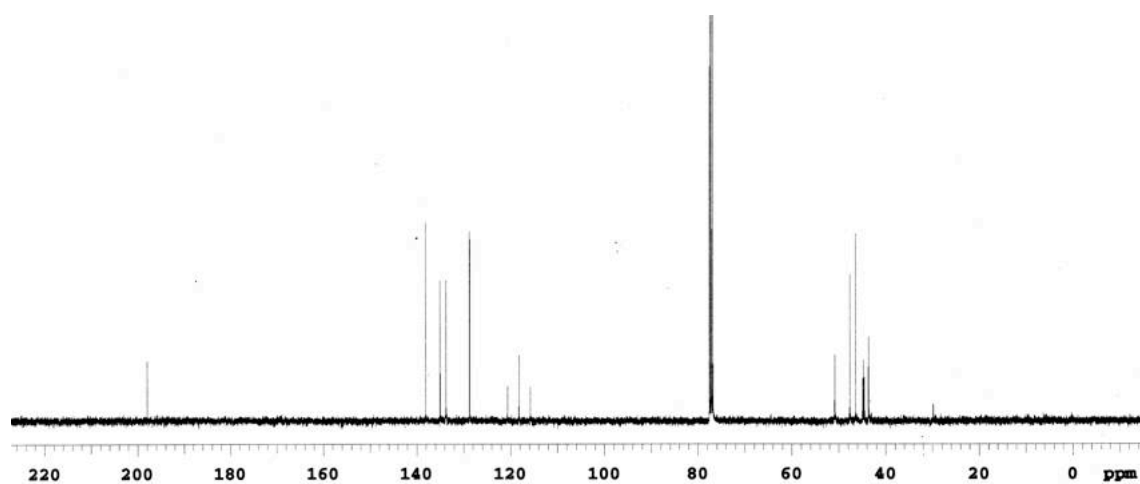

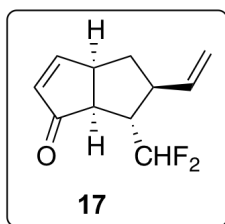

**$^1\text{H}$  NMR**

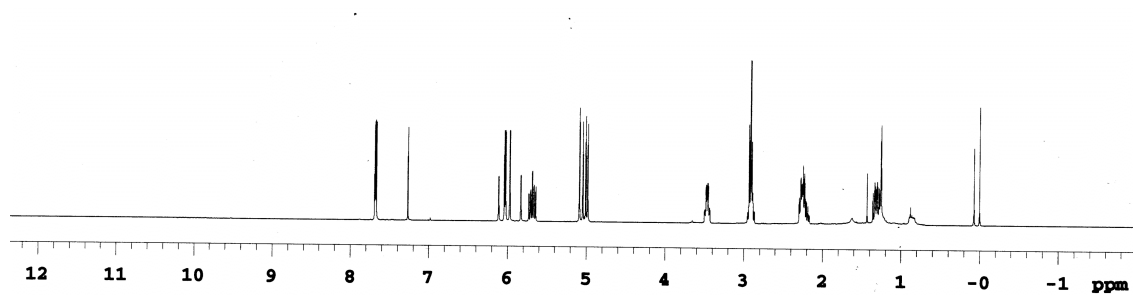

**$^{13}\text{C}$  NMR**

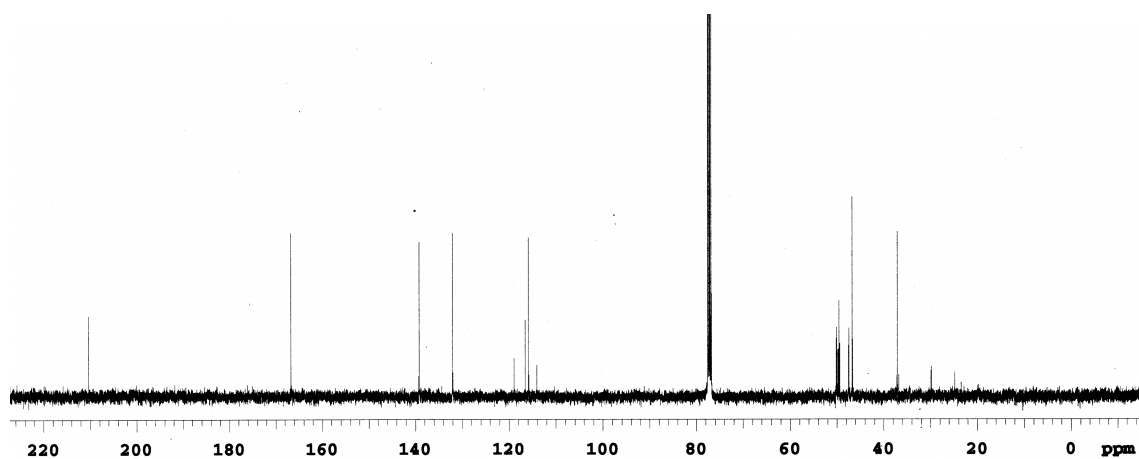

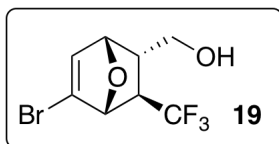

**<sup>1</sup>H NMR**

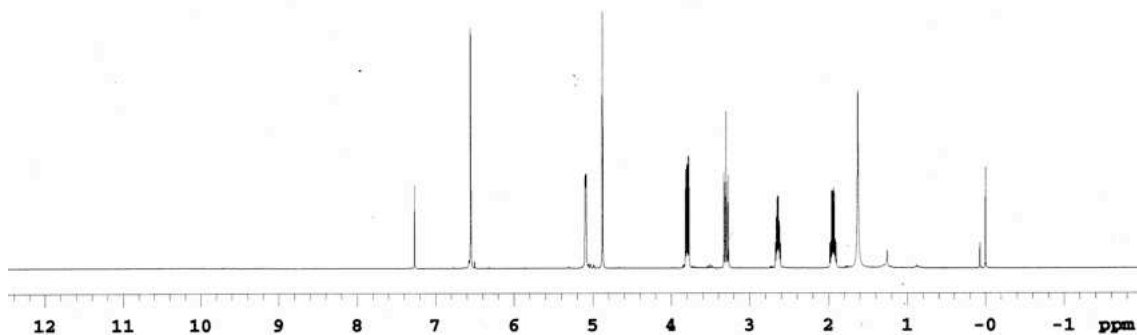

**<sup>13</sup>C NMR**

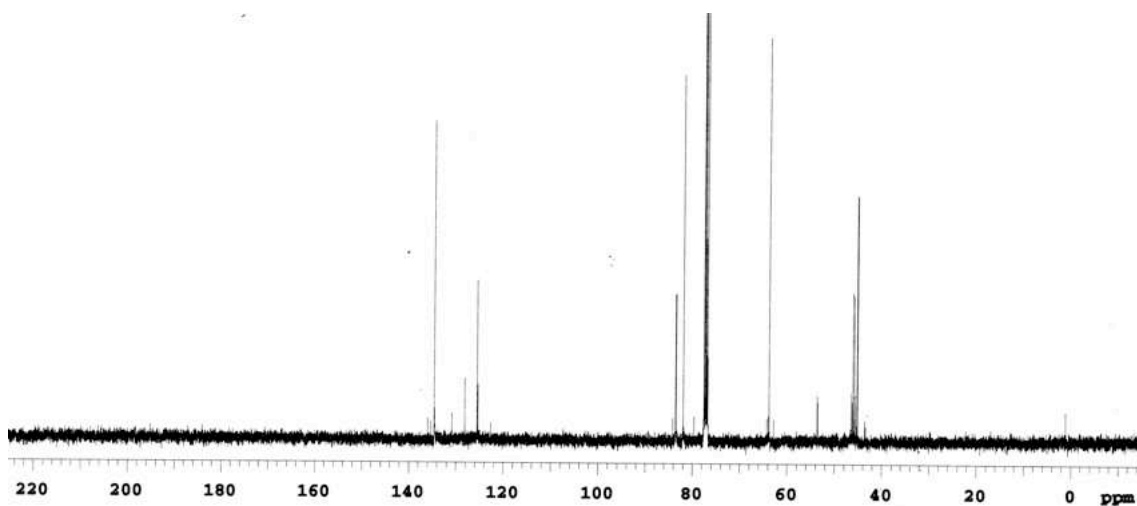

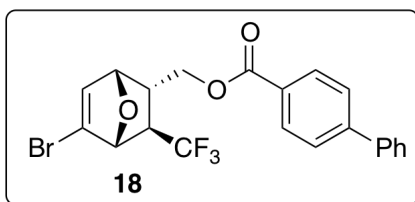

**<sup>1</sup>H NMR**

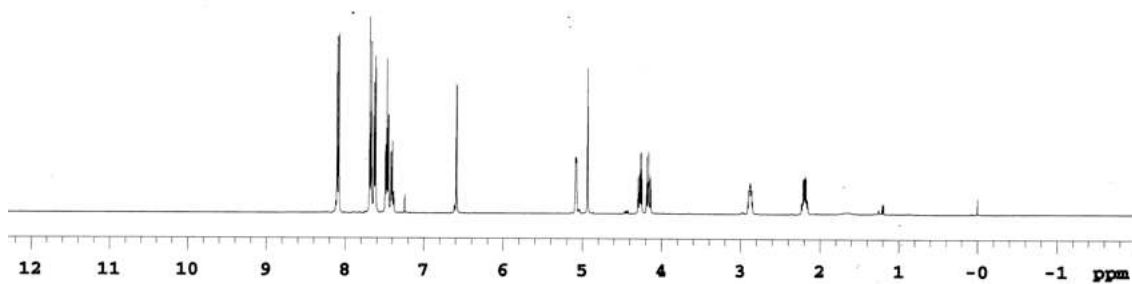

**<sup>13</sup>C NMR**

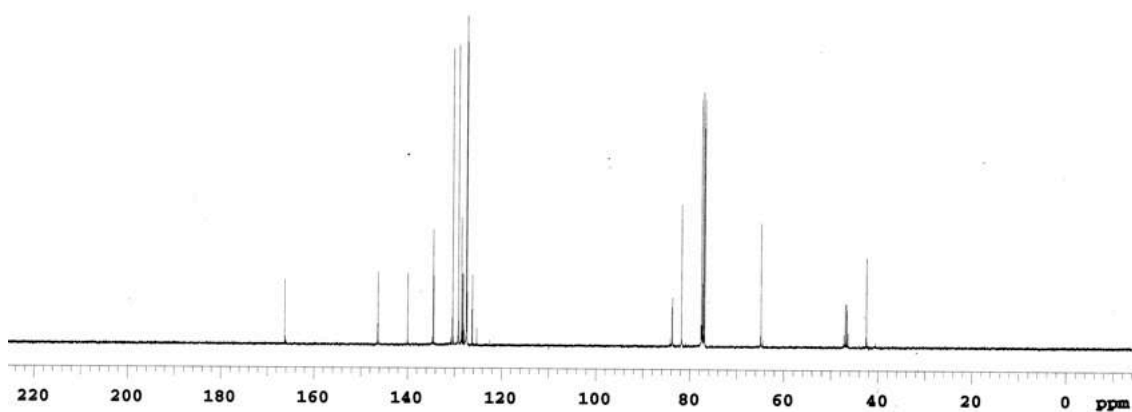

Supplement: c1cc15889a_2.pdf [file c1cc15889a_2.pdf]
